# Supplementary material for: Structures of a P4-ATPase lipid flippase in lipid bilayers
Source: PubMed Central journal article supplement (PMC7251018; doi:10.1007/s13238-020-00712-y), 2020-04-17

## Supplementary Information

### Structures of a P4-ATPase lipid flippase in lipid bilayers

Yilin He<sup>1,2</sup>, Jinkun Xu<sup>1</sup>, Xiaofei Wu<sup>1</sup>, Long Li<sup>1</sup>#

<sup>1</sup> State Key Laboratory of Membrane Biology, Peking-Tsinghua Center for Life Sciences, School of Life Sciences, Peking University, Beijing, China

<sup>2</sup> Academy for Advanced Interdisciplinary Studies, Peking University, Beijing, China

# Corresponding author: Long Li; email: [long\\_li@pku.edu.cn](mailto:long_li@pku.edu.cn)

#### Contents

Supplemental results and discussion

Materials and methods

Supplementary Figures 1-13

Supplementary Table 1

## Supplemental results and discussion

### Results

In both E1-ATP and E2P structures, ctCdc50p has extensive interactions with ctDnf1p. On the cytoplasmic side, the N-terminal peptide (residues 23-46) of ctCdc50p runs along one face of ctDnf1p, interacting with the cytosolic loops of ctDnf1p, including the segment connecting TM4 and the P domain, the loop between TMs 6 and 7 (L6/7), L8/9, and a C-terminal amphipathic helix that was suggested to undergo conformational changes upon PI4P activation in scDrs2p<sup>1,2</sup> (Fig. S10). The C-terminal tail of ctCdc50p (residues 384-398), which is invisible in the scCdc50p and hCDC50a structures, could be traced to run towards ctDnf1p. Thus, the C-terminal tail and the N-terminal peptide of ctCdc50p are in such a conformation that sandwiches the C-terminal amphipathic helix of ctDnf1p (Fig. S10). The two TMs of ctCdc50p form hydrophobic interactions with TM7 and TM10 of ctDnf1p. The ectodomain of ctCdc50p has the largest interfaces with ctDnf1p, interacting with all the exoplasmic loops except L1/2 (Fig. 1a). Thus, ctCdc50p acts as a 3-way clamp to hold TMs 3-10 of ctDnf1p in a relatively fixed conformation in both E1-ATP and E2P structures.

The E1-ATP and E2P structures have a lipid-binding site in common in a cavity formed by TMs 7, 8, and 10, on the opposite side of TMs 2, 4, and 6 (Fig. S11). Phospholipid density is observed at the cytoplasmic border of the membranes. The cavity was suggested to be a PI4P binding site for scDrs2p activation<sup>1</sup>. However, in our structures, the head group does not insert as deep as PI4P in scDrs2p E2P<sup>inter</sup> or E2P<sup>active</sup>. Instead, it is likely to be the head group of PS as modeled in scDrs2p E2P<sup>inhib</sup><sup>1</sup>.

### Discussion

#### Phospholipid flipping coupled with the E1-E2 transition

Four lipid-binding sites are identified in the groove formed by TMs 2, 4, and 6, two from E1-ATP and two from E2P. The four sites arranged in such a way that they could relay the phospholipid substrates through the groove during the E1-E2 transition (Fig. S12). Conformational changes of TM1 and TM2 guide the phospholipids to move from the exoplasmic leaflet to the cytoplasmic leaflet. ATP binding to the lipid flippase in the E1-ATP state detaches the A domain from the N and P domains. The large motion of the A domain increases the flexibility of TMs 1 and 2 and exposes a negatively charged patch formed by the residues from TMs 2 and 4. The local lipid bilayers are distorted and the membranes are thinned by almost a half. In the distorted membranes, the phospholipid molecules are more likely to tilt parallel to the

membrane plane. The lipid head groups are in an inward-facing orientation, ready to enter the groove via E1-site2 (Fig. S12a). In the E2P state, the A domain is associated with the P and N domains tightly, leading to a relatively rigid conformation of TMs 1 and 2. The local lipid bilayer structures are restored. TMs 2, 4, and 6 create a cavity (E2-site1) in the exoplasmic leaflet for shielding the polar head group of the phospholipid that has been picked up from E1-site2 (Fig. S12b). E2-site1 is disrupted in the E1-ATP state as TM2 moves towards TMs 4 and 6 and two polar residues of TM4 (Q549 and N550) lean towards the membranes. The lipid head group is likely to be squeezed out and to move forward to the cytoplasmic leaflet via E1-site1, a shallow hydrophilic cleft (Fig. S12c). Finally, the phospholipid reaches E2-site2 and is held by a clamp between TMs 2 and 4 in a flipped conformation (Fig. S12d). The phospholipid substrate is ready to be laterally released into the cytoplasmic leaflet when the clamp is disrupted in the E1-ATP state. In the scenario proposed above, it takes two E1-E2 cycles to flip one phospholipid substrate, but costs one ATP molecule per phospholipid on average because two phospholipids are present at the same time in each state. However, as we are missing several intermediate states, e.g. E2 and E1P, the exact cycle number and ATP cost per substrate need further investigation. During lipid transport, the hydrophilic head group of the phospholipid substrate is constantly protected from the hydrophobic environment by sliding through the binding sites in the positively charged groove (Fig. 2b, d). The groove provides the only continuous hydrophilic pathway in the M domain during the E1-E2 transition (Compare Fig. 2b, d and Fig. S11c). The positive charges are mainly contributed by K174, R181, and K1121 on the TMs. The highly conserved K1121 has been shown to be important for substrate binding and ATPase activity<sup>3</sup>. Consistent with biochemical data<sup>3</sup>, the groove has high affinity to the lipid substrate in the E2P state as evident by the strong phospholipid density, whereas the groove shows weak lipid binding to facilitate lipid entry and exit in the E1-ATP state as indicated by the fragmented lipid density in the structure. Similarly, a hydrophilic membrane-traversing groove is also present in the TMEM16F scramblase<sup>4</sup>.

The “hydrophobic gate” model suggests that TMs 1 and 2 move away from TMs 3 and 4 during lipid transport<sup>5</sup>. Indeed, our structures show that TM1 and TM2 becomes flexible in E1-ATP. The key residue, I364 of the “hydrophobic gate” (I554 in ctDnf1p), is at the interface between TMs 1, 2, and 4 (Fig. S13). Thus the mutations of the residue may disrupt the E1-E2 equilibrium and hamper lipid flipping as observed in the mutagenesis studies<sup>5</sup>. The “two-gate” model suggests that the flippases recognize the phospholipid substrates by interacting with the head groups. Residues other than the classical ion binding residues in ion-pumping P-type ATPases are involved in recognition<sup>6-9</sup>. Consistent with the model, the four distinct binding sites in our structures mainly interact with the lipid head groups. However, the sites do not seem to provide a discrimination mechanism for different phospholipid substrates. As shown in the phospholipid-dependent ATPase activity assays, ctDnf1p may have different

substrate specificity from scDrs2p and hATP8A1. The amino acids that interact with the polar head group of the phospholipid substrate at E2-site1 are similar to those in the structures of scDrs2p and hATP8A1. The corresponding residues are Q549 and N550 of ctDnf1p, S503 and N504 of scDrs2p, and N352 and N353 of hATP8A1 (Fig. S1). The clamp residues of E2-site2 consist of both hydrophilic and hydrophobic residues, but are not conserved among P4-ATPases (Fig. S1). The serine residues at E1-site1 are highly conserved among P4-ATPases, and E1-site2 only provides a steric opening. Further studies on other intermediate states may provide clues on the substrate specificity.

## Materials and methods

### Protein expression and purification

Protein BLAST search identified three P4-ATPases in *C. thermophilum*, including one *S. cerevisiae* Drs2p homolog (ctDrs2p), one Dnf1p and Dnf2p homolog (ctDnf1p), and one Dnf3p homolog (ctDnf3p) (Fig. S1). Only one CDC50 protein was found in the *C. thermophilum* genome (ctCdc50p). After initial screening, ctDnf1p was chosen to co-express with ctCdc50p in yeast. The genes of ctDnf1p and ctCdc50p were cloned from the cDNA library of *Chaetomium thermophilum* (var. *thermophilum* strain: DSM1495, a gift from Dr. Stefan Schoebel). Superfolder green fluorescence protein (sfGFP)<sup>10</sup>, a Twin-Strep tag and a 3C protease cleavage site were fused to the N-terminus of ctDnf1p. sfGFP, a His<sub>9</sub> tag, and a 3C protease cleavage site were fused to the N-terminus of ctCdc50p. The expression plasmids pRS426-sfGFP-twinStrep-3C-ctDNF1 and pRS424-sfGFP-His<sub>9</sub>-3C-ctCDC50 were co-transformed into *S. cerevisiae* strain BJ5465 using the LiAc/SS carrier DNA/PEG method<sup>11</sup>. Yeast cells were cultured in synthetic drop-out medium supplemented with 2% raffinose at 30 °C for about 24h to reach an optical density (OD<sub>600</sub>) of about 5. The culture was induced by the addition of 2% galactose and continued for 20 h at 25°C. The cells were harvested and stored at -80 °C until use.

The cells were suspended in the membrane extraction buffer (20 mM Tris-HCl pH 7.4, 150 mM NaCl, 5mM MgCl<sub>2</sub>, 1mM DTT, and protease inhibitor cocktails) and lysed by high pressure homogenization. The crude lysate was clarified by centrifugation (20,000×g, 25 min, 4°C). The membrane fraction was pelleted by ultracentrifugation (200,000×g, 1 h, 4°C) and washed once with the membrane extraction buffer. The membrane pellets were solubilized in 2% lauryl maltose neopentyl glycol (LMNG, Anatrace) in the membrane solubilization buffer (20 mM Tris-HCl pH 7.4, 150 mM NaCl, 5mM MgCl<sub>2</sub>, 1mM DTT, 10% glycerol, and protease inhibitor cocktails). After incubation at 4 °C for 1 h, the solution was clarified by ultracentrifugation (200,000×g, 1 h, 4°C). The supernatant was mixed with avidin (Sigma) and loaded onto a column pre-packed with StrepTactin resin (IBA

Lifesciences). The eluents were concentrated and incubated with 3C protease at 4 °C overnight. The protein solution was then loaded onto a Superdex 200 10/300 column (GE Healthcare). The peak fractions were pooled and concentrated (Fig. S2). The purified protein was either reconstituted into nanodiscs or flash-frozen in liquid nitrogen and stored at -80 °C.

The purified protein was mixed with MSP1D1<sup>12</sup> and yeast polar lipids (Avanti Lipids, 40 mg/ml dissolved in 1% DDM) at a molar ratio of 1:2:25. Bio-beads SM2 (Bio-Rad) were then added to the mixture and incubated at 4 °C overnight to remove detergents. The complex was further purified by size-exclusion chromatography on a Superdex 200 10/300 column. The peak fraction had a protein concentration of 1.0 mg/ml (Fig. S2). It was immediately used for cryo-EM sample preparation without concentrating.

#### Cryo-EM sample preparation and data collection

The freshly prepared samples were incubated with 1mM BeF<sub>3</sub> or 1mM AMPPCP on ice for 30min before vitrification. The cryo-grid preparation was performed at 4 °C and 100% humidity in an FEI Vitrobot Mark IV. 4 µl sample was applied to each freshly glow-discharged grid (Quantifoil, R1.2/1.3). The grids were then plunge-frozen in liquid ethane. The cryo-grids were screened with a 200 kV FEI Talos Arctica microscope equipped with a FEI Ceta camera. The data were collected on a 300 kV FEI Titan Krios TEM with a K2 summit camera and GIF Quantum energy filter (Gatan). The images were collected at a magnification of 130,000× with a calibrated pixel size of 1.055 Å. The dose rate was set at 8 e<sup>-</sup>/s/pixel and the exposure time was 8 s, corresponding to a total dose of 57.5 e<sup>-</sup>/Å<sup>2</sup>. Movie stacks (32 frames each) were recorded with the software SerialEM<sup>13</sup> under low-dose conditions with defocuses ranging from -1 to -2 µm.

#### Image processing

The movie stacks were subject to motion correction and electron-dose weighting by using MotionCor2<sup>14</sup> (Fig. S3a, S4a). The program Gctf<sup>15</sup> was used to estimate the contrast transfer function (CTF) parameters. Images of high quality were selected for further image processing on the basis of the CTF power spectra of the corrected images. The following calculations are performed with RELION3.0<sup>16</sup>. Particles of high quality were selected according to 2D classification (Fig. S3b, S4b) and 3D classification results. The selected particles were subject to several rounds of CTF refinement and polishing. After mask-based post-processing, the final maps had resolutions of 3.40 Å and 3.48 Å for the AMPPCP and BeF<sub>3</sub><sup>-</sup> samples, respectively (Fig. S3, S4). All the resolution estimations were based on gold-standard Fourier Shell Correlation (FSC) 0.143 criteria.

The model for the E2P (BeF<sub>3</sub><sup>-</sup>) structure was built manually in Coot<sup>17</sup>, with the guidance of the scDrs2p structures. The model was refined in real space using Phenix<sup>18</sup>. For the model building of E1-ATP (AMPPCP), the E2P model was fit in the E1-ATP density map. Each domain is subject to rigid body refinement. Due to the local resolution limits, the A and N domains were not refined further. The rest parts of the E1-ATP model were refined in real space with Phenix. Model validation was done with MolProbity<sup>19</sup>. The cryo-EM maps have been deposited in the Electron Microscopy Data Bank under accession numbers 0872 (BeF<sub>3</sub><sup>-</sup>) and 0873 (AMPPCP). The atomic structure coordinates have been deposited in the Protein Data Bank under the accession number 6LCP (BeF<sub>3</sub><sup>-</sup>) and 6LCR (AMPPCP). All other data can be obtained from the corresponding author upon reasonable request.

### ATPase activity assay

The ATPase activity assays were carried out by using BIOMOL® Green (Enzo) to measure the free phosphate concentrations. The reaction solutions consisted of 0.05mg/ml protein, 0.01% LMNG, 0.02% C<sub>12</sub>E<sub>9</sub> (Anatrace), 150 mM NaCl, 20 mM HEPES-NaOH pH 7.5, 5mM MgCl<sub>2</sub>, 1mM DTT, 2.5mM ATP, and lipids at the indicated concentrations. The reactions were carried out at 30 °C for 20 min, and then immediately diluted 10 times for color development. 100 µl reagent was added to 50 µl sample and the mixture was incubated at room temperature for 20 min. The absorbance at 650 nm was measured in a microplate reader (BioTek Cytation5). The phosphate concentration was determined by calibration with the phosphate standard (BML-KI102).

### References

- 1 Timcenko, M. *et al.* Structure and autoregulation of a P4-ATPase lipid flippase. *Nature* **571**, 366-+, doi:10.1038/s41586-019-1344-7 (2019).
- 2 Bai, L. *et al.* Autoinhibition and activation mechanisms of the eukaryotic lipid flippase Drs2p-Cdc50p. *Nat Commun* **10**, 4142, doi:10.1038/s41467-019-12191-9 (2019).
- 3 Coleman, J. A., Vestergaard, A. L., Molday, R. S., Vilsen, B. & Andersen, J. P. Critical role of a transmembrane lysine in aminophospholipid transport by mammalian photoreceptor P4-ATPase ATP8A2. *Proc Natl Acad Sci U S A* **109**, 1449-1454, doi:10.1073/pnas.1108862109 (2012).
- 4 Brunner, J. D., Lim, N. K., Schenck, S., Duerst, A. & Dutzler, R. X-ray structure of a calcium-activated TMEM16 lipid scramblase. *Nature* **516**, 207-212, doi:10.1038/nature13984 (2014).
- 5 Vestergaard, A. L. *et al.* Critical roles of isoleucine-364 and adjacent residues in a hydrophobic gate control of phospholipid transport by the mammalian P4-ATPase ATP8A2. *Proc Natl Acad Sci U S A* **111**, E1334-1343, doi:10.1073/pnas.1321165111 (2014).
- 6 Baldrige, R. D. & Graham, T. R. Identification of residues defining phospholipid flippase substrate specificity of type IV P-type ATPases. *Proc Natl Acad Sci U S A* **109**, E290-298, doi:10.1073/pnas.1115725109 (2012).

- 7 Baldrige, R. D. & Graham, T. R. Two-gate mechanism for phospholipid selection and transport by type IV P-type ATPases. *Proc Natl Acad Sci U S A* **110**, E358-367, doi:10.1073/pnas.1216948110 (2013).
- 8 Roland, B. P. & Graham, T. R. Directed evolution of a sphingomyelin flippase reveals mechanism of substrate backbone discrimination by a P4-ATPase. *Proc Natl Acad Sci U S A* **113**, E4460-4466, doi:10.1073/pnas.1525730113 (2016).
- 9 Roland, B. P. *et al.* Yeast and human P4-ATPases transport glycosphingolipids using conserved structural motifs. *J Biol Chem* **294**, 1794-1806, doi:10.1074/jbc.RA118.005876 (2019).
- 10 Pedelacq, J. D., Cabantous, S., Tran, T., Terwilliger, T. C. & Waldo, G. S. Engineering and characterization of a superfolder green fluorescent protein. *Nat Biotechnol* **24**, 79-88, doi:10.1038/nbt1172 (2006).
- 11 Gietz, R. D. & Schiestl, R. H. High-efficiency yeast transformation using the LiAc/SS carrier DNA/PEG method. *Nat Protoc* **2**, 31-34, doi:10.1038/nprot.2007.13 (2007).
- 12 Ritchie, T. K. *et al.* Chapter 11 - Reconstitution of membrane proteins in phospholipid bilayer nanodiscs. *Methods Enzymol* **464**, 211-231, doi:10.1016/S0076-6879(09)64011-8 (2009).
- 13 Mastronarde, D. N. Automated electron microscope tomography using robust prediction of specimen movements. *J Struct Biol* **152**, 36-51, doi:10.1016/j.jsb.2005.07.007 (2005).
- 14 Zheng, S. Q. *et al.* MotionCor2: anisotropic correction of beam-induced motion for improved cryo-electron microscopy. *Nat Methods* **14**, 331-332, doi:10.1038/nmeth.4193 (2017).
- 15 Zhang, K. Gctf: Real-time CTF determination and correction. *J Struct Biol* **193**, 1-12, doi:10.1016/j.jsb.2015.11.003 (2016).
- 16 Zivanov, J. *et al.* New tools for automated high-resolution cryo-EM structure determination in RELION-3. *Elife* **7**, doi:10.7554/eLife.42166 (2018).
- 17 Emsley, P., Lohkamp, B., Scott, W. G. & Cowtan, K. Features and development of Coot. *Acta Crystallogr D Biol Crystallogr* **66**, 486-501, doi:10.1107/S0907444910007493 (2010).
- 18 Afonine, P. V. *et al.* Real-space refinement in PHENIX for cryo-EM and crystallography. *Acta Crystallogr D Struct Biol* **74**, 531-544, doi:10.1107/S2059798318006551 (2018).
- 19 Chen, V. B. *et al.* MolProbity: all-atom structure validation for macromolecular crystallography. *Acta Crystallogr D Biol Crystallogr* **66**, 12-21, doi:10.1107/S0907444909042073 (2010).

## Supplementary Figures

### Fig. S1 Sequence alignment of selected P4-ATPases.

Sequence alignment of ctDnf1p, ctDrs2p and other P4-ATPases in yeast, bovine, human, and *A. thaliana*, aligned by T-coffee<sup>48</sup>. The conserved domains and transmembrane helices of ctDnf1p are indicated above the sequences. The conserved residues are indicated in red letters. The amphipathic helix of TM1 is highlighted with a green bar above the alignment. The phosphorylation site of the P domain is highlighted with a green dot. The residues involved in the negatively charged patch are highlighted with red dots. The residues contribute to the positive charge of the groove are highlighted with blue dots. The residues involved in E1-site1 are highlighted with orange dots. The residues involved in E2-site1 are highlighted with magenta dots. The residues involved in E1-site2 are highlighted with purple dots. The key isoleucine residue in the hydrophobic gate model is highlighted with a grey dot. Ct, *Chaetomium thermophilum*; Sc, *Saccharomyces cerevisiae*; Bt, *Bos Taurus*; Hs, *Homo sapiens*; At, *Arabidopsis thaliana*. Uniprot accession numbers: ScDRS2, P39524; ScDNF1, P32660; ScDNF2, Q12675; BtATP8A2, C7EXK4; HsATP8A1, Q9Y2Q0; HsATP8A2, Q9NTI2; HsATP11A, P98196; HsATP11C, Q8NB49; HsATP8B1, O43520; HsATP8B2, P98198; HsATP10A, O60312; AtALA2, P98205; AtALA10, Q9LI83.

### Fig. S2 Purification and characterization of the ctDnf1p-Cdc50p complex.

**a**, Flow chart of ctDnf1p-Cdc50p purification. **b**, Size-exclusion chromatography profile of the protein complex reconstituted into nanodiscs. The gray-shaded area (Fraction 27) was used for cryo-EM analysis. **c**, SDS-PAGE analysis of fractions from the SEC purification in **b**. **d**, ATPase activity of ctDnf1p-Cdc50p complex stimulated by phospholipids. Data points represent the mean  $\pm$  SEM of at least three experiments. POPC, 1-palmitoyl-2-oleoyl-sn-glycero-3-phosphocholine. POPS, 1-palmitoyl-2-oleoyl-sn-glycero-3-phospho-L-serine.

### Fig. S3 Cryo-EM single particle analysis of ctDnf1p-Cdc50p with AMPPCP

**a**, Representative image after motion correction. **b**, Representative results of 2D classification. **c**, Workflow of the single particle analysis. **d**, Local resolution map of the final sharpened map, shown with (left) and without (right) the nanodisc. **e**, Fourier shell correlation (FSC) curve with estimated resolution according to the gold standard.

### Fig. S4 Cryo-EM single particle analysis of ctDnf1p-Cdc50p with BeF<sub>3</sub>.

**a**, Representative image after motion correction. **b**, Representative results of 2D classification. **c**, Workflow of the single particle analysis. **d**, Local resolution map of the final sharpened map shown with (left) and without (right) the nanodisc. **e**, Fourier shell correlation (FSC) curve with estimated resolution according to the gold standard.

### Fig. S5 Examples of the fit of models into the density map.



**a-g**, Density map and model in selected regions of each domain and TMs. Residues at the beginning and end of each polypeptide segment are indicated. **h**, Density map and model of  $\text{BeF}_3^-$ ,  $\text{Mg}^{2+}$ , and D606 in the E1-ATP structure. **i**, Density map and model of AMPPCP,  $\text{Mg}^{2+}$ , and D606 in the E1-ATP structure.

**Fig. S6 Comparison of ctDnf1p-Cdc50p structures in the E1-ATP and E2P states.**

**a**, Overlay of the E1-ATP and E2P structures by superimposing TMs 3-10 of ctDnf1p and ctCdc50p (grey). The A domain is yellow in E1-ATP and blue in E2P. The N domain is red in E1-ATP and cyan in E2P. TM2 is purple in E1-ATP and TMs 1 and 2 are green in E2P. **b**, same as **a**, except the N domains are omitted for clarity. The motion distance of the A domain between the E1-ATP and E2P states is labeled. **c**, same as **a**, except the A domains are omitted. The movement of the N domain between the E1 and E2 states is indicated. **d**, same as **a**, except rotating by 90 degrees and the A and N domains are omitted to show the movements of TMs 1 and 2 between the E1-ATP and E2P states.

**Fig. S7 Comparison of AMPPCP in different E1-ATP structures**

**a-d**, AMPPCP conformations from different P-type ATPases are shown as sticks. The protein structures from which AMPPCP are extracted are labeled.

**Fig. S8 Comparison of phospholipid binding at E2-site1 in ctDnf1p and hATP8A1**

**a**, Lipid binding at E2-site1 of ctDnf1p. The protein is shown as tan ribbon representation. The density of the lipid is shown as a grey mesh. The lipid (green) and its interacting residues (tan) are shown as sticks. **b**, Lipid binding in the E2Pi-PL structure of hATP8A1 (PDB ID: 6K7M, EMDB number: 9941). The protein is colored purple. The lipid is yellow. **c**, Superimposition of the two lipid binding sites. The yellow arrow and green arrow indicate the extension directions of the lipid acyl chains in hATP8A1 and ctDnf1p, respectively.

**Fig. S9 Comparison of E1-site1 among P4-ATPase structures**

**a**, E1-site1 in ctDnf1p. The density of the possible phospholipid substrate is shown as a grey mesh. The conserved serine residue is labeled. **b-c**, same as in **a**, except showing scDrs2p and hATP8A1, respectively.

**Fig. S10 Interaction of the two terminal segments of ctCdc50p with ctDnf1p on the cytoplasmic side.**

The N-terminal and C-terminal segments of ctCdc50p are colored yellow. The rest of ctCdc50p is pink. The ctDnf1p fragments that interact with ctCdc50p are colored red. The rest of ctDnf1p is tan. Interacting segments and TMs are labeled.

**Fig. S11 A common lipid binding site in E1-ATP and E2P**

**a-b**, Lipid binding site in E1-ATP (**a**) and E2P (**b**). The density of the lipid is shown as grey meshes. The lipid molecules are shown as sticks. **c**, Electrostatic potential surfaces of E1-ATP (left) and E2P (right), showing the lipid binding environment. The lipid molecules are shown as sticks. The surfaces showing here are on the opposite side of the surfaces showing in Fig. 2**b** and **d**.

**Fig. S12 Model of phospholipid flipping by P4-ATPases**

**a**, Cartoon drawing of E1-ATP. Domains are labeled and colored as in Fig 1**a**. The membrane is colored grey. The lipid molecules with light green heads are arranged to show the distortion of bilayers. The lipid molecule with the dark green head represents a substrate that is entering the transport pathway via E1-site2. **b**, Cartoon drawing of E2P. The lipid substrate is trapped in E2-site1. **c**, As in **a**, with the lipid bound at E1-site1. **d**, As in **b**, but the lipid substrate has been flipped to the cytosolic leaflet and waits at E2-site2 to be released.

**Fig. S13 The “hydrophobic gate” residue I554 in cfDnf1p**

**a**, Top view of the I554 and its interacting residues in E2P. The interacting residues are shown as sticks.  
**b**, Top view of I554 in E1-ATP. TM4 is in the same orientation as it is in **a**.

**Table S1 Cryo-EM data collection, refinement and validation statistics**

|                                           | ctDnf1p-Cdc50p<br>with AMPPCP<br>(EMDB-0873)<br>(PDB 6LCR) | ctDnf1p-Cdc50p<br>with BeF <sub>3</sub> <sup>-</sup><br>(EMDB-0872)<br>(PDB 6LCP) |
|-------------------------------------------|------------------------------------------------------------|-----------------------------------------------------------------------------------|
| <b>Data collection and processing</b>     |                                                            |                                                                                   |
| Magnification                             | 130,000                                                    | 130,000                                                                           |
| Voltage (kV)                              | 300                                                        | 300                                                                               |
| Electron exposure (e-/Å <sup>2</sup> )    | 57.5                                                       | 57.5                                                                              |
| Defocus range (µm)                        | -1.0 to -2.0                                               | -1.0 to 2.0                                                                       |
| Pixel size (Å)                            | 1.055                                                      | 1.055                                                                             |
| Symmetry imposed                          | C1                                                         | C1                                                                                |
| Initial particle images (no.)             | 2,397,258                                                  | 2,820,251                                                                         |
| Final particle images (no.)               | 272,912                                                    | 249,694                                                                           |
| Map resolution (Å)                        | 3.40                                                       | 3.48                                                                              |
| FSC threshold 0.143                       |                                                            |                                                                                   |
| Map resolution range (Å)                  | 3.3-8.2                                                    | 3.3-7.8                                                                           |
| <b>Refinement</b>                         |                                                            |                                                                                   |
| Model resolution (Å)                      | 3.4                                                        | 3.5                                                                               |
| Map sharpening B factor (Å <sup>2</sup> ) | -94                                                        | -84                                                                               |
| <u>Model composition</u>                  |                                                            |                                                                                   |
| Non-hydrogen atoms                        | 11590                                                      | 12406                                                                             |
| Protein residues                          | 1420                                                       | 1514                                                                              |
| Ligands                                   | 17                                                         | 18                                                                                |
| <u>B factors (Å<sup>2</sup>)</u>          |                                                            |                                                                                   |
| Protein                                   | 41.2                                                       | 50.0                                                                              |
| Ligand                                    | 45.6                                                       | 51.5                                                                              |
| <u>R.m.s. deviations</u>                  |                                                            |                                                                                   |
| Bond lengths (Å)                          | 0.012                                                      | 0.010                                                                             |
| Bond angles (°)                           | 1.055                                                      | 1.088                                                                             |
| <u>Validation</u>                         |                                                            |                                                                                   |
| MolProbity score                          | 2.16                                                       | 2.35                                                                              |
| Clashscore                                | 15.5                                                       | 18.1                                                                              |
| Poor rotamers (%)                         | 0.31                                                       | 0.25                                                                              |
| <u>Ramachandran plot</u>                  |                                                            |                                                                                   |
| Favored (%)                               | 89.8%                                                      | 88.1%                                                                             |
| Allowed (%)                               | 10.2%                                                      | 11.7%                                                                             |
| Disallowed (%)                            | 0%                                                         | 0.2%                                                                              |

Fig S1

|          |                                                                                   |  |    |
|----------|-----------------------------------------------------------------------------------|--|----|
| CtDNF1   | MAPPQEEG-GG-----                                                                  |  | 10 |
| CtDRS2   | MSGRRPPG-AASSSHN-----P-NE-DLLLDLDN-DQPIYNSGQRSALTDLDDLMRSHNYDQDGLA-----           |  | 57 |
| ScDRS2   | MNDRETP-PK---RK-----P-GEDDTLFDIDFLDDTTSHSGSRSKVTNS-----HANANYIPPSHVLPEETIDLDADDDN |  | 67 |
| ScDNF1   | MSGTFHGD-GH-----APMSP-FE-DTFQFEDN-SS---N-----EDTHIA-----                          |  | 34 |
| ScDNF2   | MSSPSKPT-SPFVDDIEHESGSASNGLSSMSP-FD-DSFQFEK-SS---A-----HGNIEVA-----               |  | 51 |
| BtATP8A2 | MSRAT-----                                                                        |  | 5  |
| HsATP8A1 | MPTMRRTV-----S-----                                                               |  | 9  |
| HsATP8A2 | MLNGAGLD-----KALKMSLPRRSRIRSS-----                                                |  | 24 |
| HsATP11A | MDCSLVRTLVHR-----                                                                 |  | 12 |
| HsATP11C | MQMVPSL-PPAS-----                                                                 |  | 11 |
| HsATP8B1 | MSTERDSE-TTFDEDSQ-----P-ND-EVVPYSDD-----ET-----                                   |  | 29 |
| HsATP8B2 | MTVPKEMP-EKWARAQA-----PPS-----WS-----                                             |  | 21 |
| HsATP10A | MEREPAGT-EEP-----                                                                 |  | 11 |
| AtALA2   | MK-----                                                                           |  | 2  |
| AtALA10  | MAGPSRRR-RRLLH-----LS-----                                                        |  | 14 |

|          |                                                                                 |  |     |
|----------|---------------------------------------------------------------------------------|--|-----|
| CtDNF1   | -----                                                                           |  | -   |
| CtDRS2   | -----PSRPSVSYD-DFIGSSSSQPRHSAGRPPPS-----SGLSAPGSSSRPVGPY--STAIEINRQ             |  | 110 |
| ScDRS2   | IENDVHENLFMSNNHDDQTSWNANRFDSDAYQP-----QSLRAVKPPGLFARFGNGLKNAFTFKRKKGP--ESFEMNHY |  | 139 |
| ScDNF1   | -----P-THFD-----DGATSNKYSRPQVSNFDETPKNKR-                                       |  | 63  |
| ScDNF2   | -----K-T-----GGSVLKRQSKPMKDI--STPDL SKV                                         |  | 76  |
| BtATP8A2 | -----                                                                           |  | -   |
| HsATP8A1 | -----E--IRSRAEGYE-----                                                          |  | 19  |
| HsATP8A2 | -----VGP--VRSS-LGYK-----                                                        |  | 35  |
| HsATP11A | -----Y-----                                                                     |  | 13  |
| HsATP11C | -----E-----                                                                     |  | 12  |
| HsATP8B1 | -----                                                                           |  | -   |
| HsATP8B2 | -----                                                                           |  | -   |
| HsATP10A | -----GPPGRR-----                                                                |  | 17  |
| AtALA2   | -----                                                                           |  | -   |
| AtALA10  | -----K--IYSYTCGKS-----                                                          |  | 24  |

|          |                                                                                            |  |     |
|----------|--------------------------------------------------------------------------------------------|--|-----|
| CtDNF1   | -----                                                                                      |  | -   |
| CtDRS2   | -YSQT-SDLGNYQRYADDDYPDEGTSYYQHGGAGGEPSSGRANA---RQRNSVLSLGG-GFL-GRVKNRGLMGQYSEMDLPLTESRTGHR |  | 196 |
| ScDRS2   | -NAVT-NNELDDNYLDS-----RNKFNI-----KILFNRYILR                                                |  | 170 |
| ScDNF1   | --EDA-EEFT-----FNDDTEYDNHSFQPTPKLNNGSGTFDDVE-LDNDSGEPH-TNY-DGMKFRFMGTG                     |  | 122 |
| ScDNF2   | TFDGI-DDYSNDNDIND-DDELNGKKEIHE-----HENEVDDLHFSQATPMPNTG--GFEDVE-LDNEGSNNSDQADHKLKRVRFGTR   |  | 157 |
| BtATP8A2 | -----S-----                                                                                |  | 6   |
| HsATP8A1 | ---KT-DDVSEKTS-----                                                                        |  | 29  |
| HsATP8A2 | ---KAEDEMSRATS-----                                                                        |  | 46  |
| HsATP11A | -----C-----                                                                                |  | 14  |
| HsATP11C | -----C-----                                                                                |  | 13  |
| HsATP8B1 | ---E---DEL D-----DQGS AVEP-----EQNRVNR-----EAEENREPFRR                                     |  | 59  |
| HsATP8B2 | -----R---KKPS-----                                                                         |  | 26  |
| HsATP10A | ---RR-R---EG-----                                                                          |  | 22  |
| AtALA2   | -----                                                                                      |  | -   |
| AtALA10  | ---SF-Q--EDHSN-----                                                                        |  | 32  |

|          |                                                                                   |                 |     |
|----------|-----------------------------------------------------------------------------------|-----------------|-----|
|          |                                                                                   | <b>A domain</b> |     |
| CtDNF1   | RLTVKSGARKRLSLMTR-----AQAKNSATEKRQSGV--TDDGSPAADGD-QKEGSISSSNNGGSAPRKLKYFNLLPLPPE |                 | 96  |
| CtDRS2   | TDT-----GSGEIPAQPEKKKFDGPNFRFGFRS-----KPD-P-----STLGFRRIIYLNPP                    |                 | 243 |
| ScDRS2   | KN-----VGDAE-----GNGEPRVIHINDSL                                                   |                 | 191 |
| ScDNF1   | RNKKGN-----PIMGRSKTLK-----WARKNIPNPFED--FT--KDDIDPGAI--NRAQELRTVYVYNNMPLPKD       |                 | 179 |
| ScDNF2   | RNKSGR-----IDINRSKTLK-----WAKKNFHNAIDE--FSTKEDSLENSAL--QNRSELETVYVYNNLPLED        |                 | 217 |
| BtATP8A2 | -----                                                                             |                 | 24  |
| HsATP8A1 | -----LAD-Q-----EEVRTIFINQPQ                                                       |                 | 45  |
| HsATP8A2 | -----VGD-Q-----LEAPARTIYLNQPH                                                     |                 | 64  |
| HsATP11A | -----AGE-E-----NWVDSRTIYVGHREPP                                                   |                 | 34  |
| HsATP11C | -----AGE-E-----KRVGTRTVFVGNH-PV                                                   |                 | 32  |
| HsATP8B1 | KE-----CTW-Q-----VKANDR-KYHEQPHEM                                                 |                 | 80  |
| HsATP8B2 | -----WG-----TEEERRARANDRE                                                         |                 | 41  |
| HsATP10A | -----RTRTVRSNLLPPPG                                                               |                 | 36  |
| AtALA2   | -----RFVYINDDE                                                                    |                 | 11  |
| AtALA10  | -----IGG-----PGFSRVVYCNPEGS                                                       |                 | 49  |

|          |                                                                                             |            |            |     |
|----------|---------------------------------------------------------------------------------------------|------------|------------|-----|
|          | <b>A domain</b>                                                                             | <b>TM1</b> | <b>TM2</b> |     |
| CtDNF1   | LKDE-----EGHP IQQFPRNKIRTAKYTPLSFEPKKNLWFQFHNIANIFLFLVILVIFPIFGVNPGLNSVPLIVITVTAIKDAIED     |            |            | 179 |
| CtDRS2   | -----ANAANKYVDNHVSTAKYNFAFLPKFLFEQFSKFAFIFFLFTAGLQQIPGLSPTNRYTTIGPLIVLLVSAKDELVED           |            |            | 321 |
| ScDRS2   | -----ANSSFGYSDNHISTTKYNFAFLPKFLFEQFSKYANLFFELCTSAIQQVHVSPTNRYTTIGPLIVLLVSAKMECIED           |            |            | 269 |
| ScDNF1   | MIDE-----EGNPIMQYPRNKIRTKYTPLTFEPKNILFQFHNFANVYFLVLIILGAFQIFGVNTPGLSAVPLVVIVITAIKDAIED      |            |            | 262 |
| ScDNF2   | MLDE-----DGLPLAVYPRNKIRTKYTPLTFEPKNILFQFHNFANVYFLVLIILGAFQIFGVNTPGFASVPLIVIVITAIKDGIED      |            |            | 300 |
| BtATP8A2 | -----LNKFCDNQISTAKYSVVVTELRFLYEQRRAANAFELFIALLQQIPDVSPTRGRYTLVPLIIILTIAGIKEIVED             |            |            | 99  |
| HsATP8A1 | -----LTKFCNNHVSTAKYNIITFLRFLYEQFRRAANSEFLFIALLQQIPDVSPTRGRYTLVPLIFLAVAAIKEIIED              |            |            | 120 |
| HsATP8A2 | -----LNKFRDNQISTAKYSVLTFLRFLYEQRRAANAFELFIALLQQIPDVSPTRGRYTLVPLIIILTIAGIKEIVED              |            |            | 139 |
| HsATP11A | -PGA-----EAYIPQRYPDNRIVSSKYTFWNEIPKNLFEQFRVANFVFLIIFLVQLI-IDTPSPVTSGPLFFVITVTAIKQYED        |            |            | 115 |
| HsATP11C | -SET-----EAYIAQRFCDNRIVSSKYTLWNEIPKNLFEQFRRIANFVFLIIFLVQVT-VDTPSPVTSGLPLFFVITVTAIKQYED      |            |            | 113 |
| HsATP8B1 | -NTKFL-----CIKESKYANNAIKTYKYNFAFTFIMNLFEPQFRANLFLALLLQAVPQISTLAWYTLVPLVVVLGVTAIKDLVD        |            |            | 163 |
| HsATP8B2 | -----YNEKFQYASNCIKTSKYNILTFELVNLFEQFQEVANTYFLFLLILQLIPQISSLSWFTTIVPLVGLVLTITAVKDATD         |            |            | 119 |
| HsATP10A | AEDPAAGAAGKERRRRRGCQHLADNRLKTKYTLLESFEPKKNLFEQFRPANVYFVFIALLNFVPAVNAFQPLALAPVLFILATAFRDLWED |            |            | 130 |
| AtALA2   | -----ASKELCCDNRI SNRKYTLWNEIPKNLFEQFRFMNQYFLLIACLQLWSLITPVNPASTWGPLIFIFAVSASKEAWD           |            |            | 88  |
| AtALA10  | -----PAAERRNYAGNYVRSTKYTVASFEKSLFEQFRVANFVFLVITGIIISL-TDLSPYGAVSALLPLALVISATMVKEGIED        |            |            | 127 |

|          | TM2 cont.                                                                                     | A domain                                                                       |     |
|----------|-----------------------------------------------------------------------------------------------|--------------------------------------------------------------------------------|-----|
| CtDNF1   | YRRITLIDIELNNA                                                                                | PVHRLQGWENNVNVEKDNVSLWRRFFKANSRFFGSIWHL-IERLWKEDAQSMR-----QR-FASADPRMSIETRTAPW | 262 |
| CtDRS2   | YRKQADKALNMSKTRVLRG-                                                                          |                                                                                | 341 |
| ScDRS2   | IKRANSDEKELNNSAEIFSE-                                                                         |                                                                                | 289 |
| ScDNF1   | SRRTVLDELVNNTKTHILEGVENENVSTDNISLWRRFFKANSRLLFKFIQYCKEHLTEGKKRMRQRKHELVRVQKTVGTSGPRSSLDSID--- |                                                                                | 353 |
| ScDNF2   | SRTVLDELVNNTRTHILSGVKNENAVDNLWRRFFKANRALIKIFEYFSENLTAAAGREKQLQKKREELRRKRNSRSFSGPRGSLDSIG---   |                                                                                | 391 |
| BtATP8A2 | FKRHKADNAVNKKKTIIVLRN-                                                                        |                                                                                | 119 |
| HsATP8A1 | IKRHKADNAVNKKQTOVLRN-                                                                         |                                                                                | 140 |
| HsATP8A2 | FKRHKADNAVNKKKTIIVLRN-                                                                        |                                                                                | 159 |
| HsATP11A | WLRHKADNAMNQCVPVHFIOH-                                                                        |                                                                                | 135 |
| HsATP11C | CLRHRADNEVNKSTVYIIEEN-                                                                        |                                                                                | 133 |
| HsATP8B1 | VARHKMDKEINNRTECEVIKD-                                                                        |                                                                                | 183 |
| HsATP8B2 | YFRHKSQDNQVNNRQSQVLIN-                                                                        |                                                                                | 139 |
| HsATP10A | YSRHRSDHKINHLGCLVFSRE-                                                                        |                                                                                | 151 |
| AtALA2   | YHRYLSDKKAKEKVVIVKQ-                                                                          |                                                                                | 108 |
| AtALA10  | WRKQQDIEVNNRKVKVHGD-                                                                          |                                                                                | 147 |

|          | A domain                                                                                      |     |
|----------|-----------------------------------------------------------------------------------------------|-----|
| CtDNF1   | DPSHRRSVASHTTEIEIQMTVPVSPVPHDPDPTVSSAIENEATLLQ--NLKGLDINHEIPVSGKA--RFHKDANKNLVVGDFVRIYNDDELPA | 351 |
| CtDRS2   |                                                                                               | 369 |
| ScDRS2   |                                                                                               | 319 |
| ScDNF1   | --SYR-----VSADYGRPSLDYDNLEQGAG-----EANIVDRSLPRTDC--KFAKNYKGVKVGDIVRIHNDEIPAD                  | 418 |
| ScDNF2   | --SYR-----MSADFGRPSLDYENLNQMTSQANRYNDGENIVDRTLQPNPEC--RFAKDYKNNVVGDIVRVHNDDEIPAD              | 463 |
| BtATP8A2 |                                                                                               | 147 |
| HsATP8A1 |                                                                                               | 168 |
| HsATP8A2 |                                                                                               | 187 |
| HsATP11A |                                                                                               | 163 |
| HsATP11C |                                                                                               | 161 |
| HsATP8B1 |                                                                                               | 211 |
| HsATP8B2 |                                                                                               | 167 |
| HsATP10A |                                                                                               | 180 |
| AtALA2   |                                                                                               | 136 |
| AtALA10  |                                                                                               | 176 |

|          | A domain                                                                                           |     |
|----------|----------------------------------------------------------------------------------------------------|-----|
| CtDNF1   | IILLATSDDPDGACYVEETKLNLDGETNLKVRQALRCGRITLK-HA-RDCERAQVIESEPPQPNLYKYNGAIRWKQRPVWDPHPGEPREMSEPIGIDN | 443 |
| CtDRS2   | LVLASSEPEGLCYIETANLDGETNLKIKQALPETASLV-SS-TELSRLGRLRSEQVNSLSLYTYEATLTLQGTGG-----GEKELPLNPEQ        | 453 |
| ScDRS2   | TIIILSSSEPEGLCYIETANLDGETNLKIKQSRVETAKFI-DV-KTLKNMNGKVVSEQVNSLSLYTYEGTMTLN-----DRQIPLSPDQ          | 399 |
| ScDNF1   | IILLATSDDPDGACYVEETKLNLDGETNLKVRQSLKCTNTIR-TS-KDIARTKFWIESEGEHSNLYTYQGNMKWRNLA---DG--EIRNEPITINN   | 504 |
| ScDNF2   | MILLATSDDPDGACYVEETKLNLDGETNLKVRQSLKCSKIIK-SS-RDITRTKFWIESEGEHANLYSYQGNFKWQDTQ---NG--NIRNEPVNINN   | 549 |
| BtATP8A2 | VVLLSSSEPEQAMCYIETANLDGETNLKIRQGLSHADMQ-TR-EVLMKLSGTIECEGPNRHLYDFTGNLNLGD-----KSPVALGPDQ           | 228 |
| HsATP8A1 | LISLSSEPEQAMCYIETANLDGETNLKIRQGLPATSDIK-DV-DSLMRISGRIESESNRHLYDFVGNIRLDG-----HGTVPLGADQ            | 249 |
| HsATP8A2 | VVLLSSSEPEQAMCYIETANLDGETNLKIRQGLSHADMQ-TR-EVLMKLSGTIECEGPNRHLYDFTGNLNLGD-----KSLVALGPDQ           | 268 |
| HsATP11A | LIFLSSNRDGTGHVTHASLDGESSRHTHYAVDQTGKGFH-TE-EDIGGLHATIECEGQPPDLYKFGVGRINYSYL---N---DPVVRPLGSEN      | 248 |
| HsATP11C | LILLSSCTDPTDGTGYVTASLDGESSRHTHYAVRDTIALC-TA-ESIDTLRAAIECEGQPPDLYKFGVGRINISYNS---L---EAVARSLGPEEN   | 246 |
| HsATP8B1 | LILLSSSEPNLSQYVEETAEALDGETNLKRFKMSLEITDQYLORE-DTLATFDGFIECEGPNRDLKFTGTLFWR-----NTSFPLDADK          | 292 |
| HsATP8B2 | LILLSSSEPEGLCYIETAEALDGETNMMVQAIPTSELG-DI-SKLAKFDGCEVIECEGPNRDLKFTGTLFWR-----ENKFPLSNQN            | 247 |
| HsATP10A | LILLSSSDPDGLGHITAEALDGETNLKRRQVVRGFSELV-SE-FNPLTFSSVIECEGPNRDLKFTGTLFWR-----GKKAGLYKEN             | 261 |
| AtALA2   | LVLGTSDDPDGACYVEETAEALDGETDLKTRVIPSAC-VGI-DL-ELLHKMGVIECEGPKDKDIRFDANMRLFPF---I---DNDVCSLTIKN      | 220 |
| AtALA10  | LLLSSSYEDSVQYVEETAEALDGETNLKRVKQGLEATSSLL-NQSDSDFDKFRGVVRCEDPNVNLVYVFGTLALEE-----ERFPLSIQQ         | 257 |

|          | A domain                                                                                           | TM3 |     |
|----------|----------------------------------------------------------------------------------------------------|-----|-----|
| CtDNF1   | LLRGRGHLRNTAEWALVVVFTGHDTKIMMNAAGTIPSSRRARIARELNFNVICNFGILLIMCLIAAIAANGIAW--G--KTDASL-AWFEYGSIGG-  |     | 531 |
| CtDRS2   | LLRGTALRNTAWIHVVVFTGHDTKIMRNATAAPIKRTVKEKQNLKLVMLVGMVLSVISTAGDLIMR--G--V-AGRS-FEYLDLGDIT-          |     | 540 |
| ScDRS2   | MIRGTALRNTAWIFGLVIFVFTGHDTKIMRNTATAPIKRTAVEKIIINRQIIALFTVLIVLILISSIGNVIMS--T--A-DAKH-LSYLYLEGTN-   |     | 486 |
| ScDNF1   | VLRGCTLRNTKAWMGVVFVFTGHDTKIMLNSGITPTPKSRISRELNFVSVINFLVLLFICLVFSGIANGVYY--D--KGRSR-FYFEGTITAG-     |     | 592 |
| ScDNF2   | LLRGTALRNTKAWMGVVFVFTGHDTKIMINAGVPTPKSRISRELNFVSVILNVLVLLFICLVFAGIANGVYY--K--QKPRSR-DYFEGTITAG-    |     | 637 |
| BtATP8A2 | ILRGTALRNTQVWGFVVFVFTGHDTKIMQNSTKAPLRSNVEKVTNVQIILVLFGLLVMALVSSVAGALYWN--G--S-QGGK-NWYIKKMDAT-     |     | 315 |
| HsATP8A1 | ILRGAQLRNTQVWGFVVFVFTGHDTKIMQNSTSPPLRLSNVERITNVQIILILFCILIAMSLVCSVSGAIWN--R--R-HSGK-DWYLNLYGG-     |     | 336 |
| HsATP8A2 | ILRGTALRNTQVWGFVVFVFTGHDTKIMQNSTKAPLRSNVEKVTNVQIILVLFGLLVMALVSSVAGALYWN--R--S-HGK-NWYIKKMDT-       |     | 355 |
| HsATP11A | LLRGTALRNTKTEKIFGVAIYTGEMTKMALNYQSKSQRRSAVESKSMNAFLIVLYLCILISKALINTVLKYMWQ--S--EPPFRDE-PWYNQKTESER |     | 337 |
| HsATP11C | LLMKGATLRNTKTEKIFGVAIYTGEMTKMALNYQSKSQRRSAVESKSMNAFLIVLYLCILISKALINTVLKYMWQ--S--TPYNDL-PWYNQKTKER  |     | 335 |
| HsATP8B1 | ILRGCVIIRNTDFCHGLVIFACADTKIMKNSGKTRFRRTKIDYLMNMYVYTFVVLVLLSAGLAIGHAYWE--A--Q-VGNS-SWYLYDGE-D-      |     | 378 |
| HsATP8B2 | MLRGCVLRNTEWCFGLVIFAGPDTKIMQNSGRTKFRRTSIDRLMNTLVLWIFGLVCMGVILAIGNAWE--H--E-VGMRFOVYLPWDEAV-        |     | 335 |
| HsATP10A | LLRGTALRNTDAVVGIVYAGHETKALLNNSGPRYRSKLERQMNCDVLCVLLVCMMSLFSAVGHGLIWRYY--Q--EKKS-LFYVPKSDGSS        |     | 351 |
| AtALA2   | TLRQSCYLNRNTEWACVSVYTGNTKLGMSRGAEPRLTAMDAMDKLGTGAIFFVQIVVVLVLAGIANGVWK--D--T-EARK-QWYVQYPEEA-      |     | 307 |
| AtALA10  | ILLRDSKLRNTEVYVCAVVFVFTGHDTKVIQNSTDPSSRSRRIERTMDKIYLMFGLVFLMSVFGSIFGVETREDKVKNGRTE-RWYLKPDADI      |     | 350 |

|          | TM4                                                                                              | P domain | N |     |
|----------|--------------------------------------------------------------------------------------------------|----------|---|-----|
| CtDNF1   | -----T-PAL-T-GFTFFWAAVIVFQNLVLEISLVSISLEIVRTLQAFETIYSYVGMYYEKIQPCIPKSNWISDDVQVQIEYIFSDKGTGLTQNVM |          |   | 617 |
| CtDRS2   | -----GA-IAVFKIFIKDMVTYVWVLFSSLVLEISLVTLEMVYWHGILINDELIDYVDVTPANCRTSSLVEEIGMVEYVFSDKGTGLTQNME     |          |   | 629 |
| ScDRS2   | -----KA-GLF---FKDFTLFWLFSNLVLEISLFTVELIKYYQAFMINDSGLDLYYEKDTPTVVRTSSLVEEIQVIEYIFSDKGTGLTQNME     |          |   | 571 |
| ScDNF1   | -----S-AAT-N-GFVSFWVAVILYQSLVLEISLVSISVEIKTAQAAYFYGVLLYNAKLDYPTPKSNWISDDVQVQIEYIFSDKGTGLTQNVM    |          |   | 678 |
| ScDNF2   | -----S-AST-N-GFVSFWVAVILYQSLVLEISLVSISVEIKTAQAAYFYGVLLYNAKLDYPTPKSNWISDDVQVQIEYIFSDKGTGLTQNVM    |          |   | 723 |
| BtATP8A2 | -----S-DN---FGYLLTFIILYNNLLEISLVLTVLEVVKYTQALFINWDTMYIYGNTPAMARTSNLNEEQVYIFSDKGTGLTQNIMN         |          |   | 399 |
| HsATP8A1 | -----A-SN---FGLNFLTFIILFNNLLEISLVLTVLEVVKYTQAFINWDLDMHYEPTDTAAMARTSNLNEEQVYIFSDKGTGLTQNVMQ       |          |   | 420 |
| HsATP8A2 | -----S-DN---FGYLLTFIILYNNLLEISLVLTVLEVVKYTQALFINWDTMYIYGNTPAMARTSNLNEEQVYIFSDKGTGLTQNIMN         |          |   | 439 |
| HsATP11A | -----QRNLF-L-K-AFTDFLAFMVLFNFIIVFSVMVTVEMQKFLGSFFITWEDMDEETGEGPLVNTSDLNEEQVYIFSDKGTGLTQNIMV      |          |   | 425 |
| HsATP11C | -----ETLKV-L-MFTDFLSFMVLFNFIIVFSVMVTVEMQKFLGSFFITWEDMDEETGEGPLVNTSDLNEEQVYIFSDKGTGLTQNIMV        |          |   | 423 |
| HsATP8B1 | -----DT-PSY-R-GFLIFWGYIIVLNTMVEISLVSVEVIRLQSHFINWDLQMYAEDTPAKARTTTLNEEQVYIFSDKGTGLTQNIMT         |          |   | 465 |
| HsATP8B2 | -----DS-AFF-S-GFLFSWYIILNLTVEISLVSVEVIRLGHSEFINWDLQMYAEDTPAKARTTTLNEEQVYIFSDKGTGLTQNIMV          |          |   | 422 |
| HsATP10A | -----LS-PVT-A-AVYSFLTMIIVLQVLEISLVSVEIVKACQVYFINWDMQLYDEETDSQLQCRALNITEDIQVYIFSDKGTGLTQNIMV      |          |   | 438 |
| AtALA2   | -----PWY-E-LLVIPLRFELLCSTMIETISIKVSLDLVGLYAKETIENWDMIDQETGTASAAANTAISEDQVYIFSDKGTGLTQNIMV        |          |   | 392 |
| AtALA10  | FFDPER-APM-A-AIYHFFATMLYSYFIETISLVSVEIVKVLQYKFINRDIHMYYEETDKPAQARTSNLNEEQVYIFSDKGTGLTQNIMV       |          |   | 441 |

|          | N domain                                                                                   |     |
|----------|--------------------------------------------------------------------------------------------|-----|
| CtDNF1   | FKKATINGQFYGEAYTEAQAG--M--DRRRGINVEEEA-----KVIREEIAAAKVR-----AIRGL                         | 669 |
| CtDRS2   | FKACSTAGVMYAESVPEDR-V--A--TIEDGV-----                                                      | 656 |
| ScDRS2   | FKSCSITAGHCYIDKIPEDK-T--A--TVEDGI-----                                                     | 598 |
| ScDNF1   | FKKCTINGVSYGRAYTEALAG--L--RKRQGIDVETEG-----RREKAEIAKDRDT-----MIDEL                         | 730 |
| ScDNF2   | FKKCTINGVSYGRAYTEALAG--L--RKRQGVVVESEG-----RREKEEIAKDRDT-----MIDEL                         | 775 |
| BtATP8A2 | FKKCSITAGVTYGHFPELTR-E--P--SSDDFS--R-----                                                  | 427 |
| HsATP8A1 | FKKCTIAGVAYGHVPEPEDYD--C--SPDEWQ-----                                                      | 448 |
| HsATP8A2 | FKKCSITAGVTYGHFPELAR-E--P--SSDDFC--R-----                                                  | 467 |
| HsATP11A | FKKCCIEGHVYVPHVICNGQV--L--PESSGID-----                                                     | 454 |
| HsATP11C | FIECCIDGHKYKGVTO--EVDG--L--SQTDTL-----                                                     | 451 |
| HsATP8B1 | FKKCCINQIYGDHRDASQ-H--NH--NKIEQVDFS-----                                                   | 496 |
| HsATP8B2 | FNKCSINCHSYGDVDFDLG-HKAELGERPEPVDFS-----                                                   | 456 |
| HsATP10A | FRRCTVSGVEYSHDANAQR-L---ARYQEADSEEEVVPRGGSVSRQSGISGSG---HQSVRVVHRTQSTKSHRRTGSRAEAKRASMLSKH | 520 |
| AtALA2   | FRRCIGIFYGNENGD-----                                                                       | 410 |
| AtALA10  | FKKCSITAGKAYGRGITFEVERA--M--AVRSGGS-----PLV-----NEDLDV-----VVD--                           | 482 |

|          | N domain                                                                                        |     |
|----------|-------------------------------------------------------------------------------------------------|-----|
| CtDNF1   | RELHDNPFYLHDEDMTFTA-PDFVEDLAGK-----NGPEQQQATEHFMALALALCHTVVAEKQ-----                            | 724 |
| CtDRS2   | -----EVGIHDFKRLKDNLNK-----GHPTAQAIIDHFLTLTATCHTVIPEQK-----                                      | 698 |
| ScDRS2   | -----EVGYRKFDDLKKNLND-----PSDEDSPIINDFLTLTATCHTVIPEFQ-----                                      | 641 |
| ScDNF1   | RALSGNSQFYPEEVTFVS-KEFVRDLKGA-----SDEVQQRCEHFMALALALCHSVLVEAN-----                              | 785 |
| ScDNF2   | RMSDNTQFCPEDLTFVS-KEIVEDLKGS-----SGDHQQKCEHFMALALALCHSVLVEPN-----                               | 830 |
| BtATP8A2 | -----IPPPSDSCDFDD-PRLLKNIED-----NHPTAPCIQEFLLTLAVCHTVVPERD-----                                 | 475 |
| HsATP8A1 | -----NS-QFGDEKTFDD-SLLENLQN-----NHPTAPIICEFLTMMAVCHTAVPERE-----                                 | 495 |
| HsATP8A2 | -----MPPPCSDSCDFDD-PRLLKNIED-----RHPTAPCIQEFLLTLAVCHTVVPEKD-----                                | 515 |
| HsATP11A | -----MID-----SSPS-----V-NGREREELFRALCLCHTVQVKDDSDVDPG-----                                      | 492 |
| HsATP11C | -----TYFD-----K-----VDKNREELFRALCLCHTVVEIKTNDAVD-----                                           | 484 |
| HsATP8B1 | -----WNTYADGKLAFYD-HYLIEQIQS-----G--KEPEVRFEFLLAVCHTVMVDR-----                                  | 541 |
| HsATP8B2 | -----FNPLADKKFLFWD-PSLLEAVKI-----G--DPHTHEFRLLSLCHTVMSEEK-----                                  | 501 |
| HsATP10A | TA-----FSSPM-EKDI TPD-PKLLKVSCEDKSLAVARHQEHLLAHLSPELSDFDFEIALITICNTVVTSPDQ---PRTKVRVRFELKSPVKTI | 606 |
| AtALA2   | -----LKD-AQLLNLAITS-----GSTDIVRFELTVMAICNTVLPVQ-----                                            | 444 |
| AtALA10  | -----QSGPKVKGFNFED-ERVMMGNWV-----RQPEAAVLQKFRLLAVCHTAVIPETD-----                                | 530 |

|          | N domain                                                                                     |     |
|----------|----------------------------------------------------------------------------------------------|-----|
| CtDNF1   | -----                                                                                        | 738 |
| CtDRS2   | -----DSGEIKYQASSP                                                                            | 710 |
| ScDRS2   | -----SDGSIKYQASSP                                                                            | 653 |
| ScDNF1   | -----PDNPKKLDLKAQSP                                                                          | 799 |
| ScDNF2   | -----KDDPKKLDIKAQSP                                                                          | 844 |
| BtATP8A2 | -----GDSIVYQASSP                                                                             | 486 |
| HsATP8A1 | -----GDKIYQASSP                                                                              | 506 |
| HsATP8A2 | -----GDNIYQASSP                                                                              | 526 |
| HsATP11A | -----RKSPDGGKSCVYISSP                                                                        | 509 |
| HsATP11C | -----G--ATESAELTYISSP                                                                        | 499 |
| HsATP8B1 | -----TDGQLNYQASSP                                                                            | 553 |
| HsATP8B2 | -----NEGELYKAQSP                                                                             | 513 |
| HsATP10A | EDFLRRFTPSCLTSGCSIGSLAANKSSHKLGSSFPSTPSSDGMLLRLEERLGOPTSAIASNGYSSQADNASELAQE--QESERELRYEASSP | 698 |
| AtALA2   | -----SKAGDIVYKAQSQ                                                                           | 457 |
| AtALA10  | -----EESGNVSYEASSP                                                                           | 543 |

|          | N domain                                                                                       |     |
|----------|------------------------------------------------------------------------------------------------|-----|
| CtDNF1   | DEAALVATARDMGFTVLGMSDGGIN--VNV-----MGKDMHFVLSIIEFNSSRKRMSSTIVRM-P-----DGRILLFCCKGADSVIYRSLKKG  | 817 |
| CtDRS2   | DEGALVEGAVQLGYRF LARKPRAVI--ITV-----NGQLEYELLAVCFENSTRKRMSSTIYRC-P-----DGKIRIYCKGADTVILERLNDQ  | 789 |
| ScDRS2   | DEGALVQGGADLGKFIIRKPNVSVTLLEE-----TGEEKEYQLNICEFNSTRKRMSAIFRF-P-----DGSIKLFCCKGADTVILERLDDE    | 734 |
| ScDNF1   | DEAALVATARDVGFSGVFKTKKGLI--IEM-----QGIQKEFEILNLEFNSSRKRMSCVKI-PGLNPGDEPRALILCKGADSIYRSLRSQ     | 884 |
| ScDNF2   | DESAALVSTARQLGYSFVGSSKGLI--VEI-----QGVQKEFOVLNVLEFNSSRKRMSCI IKI-PGSTPKDEPKALLICKGADSVIYRSLDRT | 929 |
| BtATP8A2 | DEAALVKGARKLGFVFTARTPYSVI--IEA-----MGQEQTFGILNVLEFNSSDRKRMSVIVRT-P-----SGQLRLYCKGADNVI FERLSKD | 565 |
| HsATP8A1 | DEGALVRAAKQLNFVTGRTPDSVI--IDS-----LGQEERYELNLVLEFNSTRKRMSVIVRT-P-----SGKLRLYCKGADTVIYDRLAET    | 585 |
| HsATP8A2 | DEAALVKGAKKLGFVFTARTPFSVI--IEA-----MGQEQTFGILNVLEFNSSDRKRMSVIVRT-P-----SGRLRLYCKGADNVI FERLSKD | 605 |
| HsATP11A | DEVALVEGQVRLGFTYLRKLDNYME--ILN-----RENHIERFELLEILSDFSRRRMSVIVKS-A-----TGEIYLFCKGADSSIFPRVIEG   | 589 |
| HsATP11C | DEHALVKGAKRYGFTPLGNRNGYMR--VEN-----QRKEIEEYELLHTLNDAVRRRMSVIVKT-Q-----EGDILLFCCKGADSAVFPVRQNH  | 579 |
| HsATP8B1 | DEGALVNAARNFGFAFLAR TQNTIT--ISE-----LGTERTYVNLAILDNSTRKRMSIIVRT-P-----EGNIKLYCKGADTVIYERLHRM   | 632 |
| HsATP8B2 | DEGALVTAARNFGFVFRSRTPK TIT--VHE-----MGTAITYQLLAILDNSTRKRMSVIVRN-P-----EGKIRLYCKGADTILLDRLHHS   | 592 |
| HsATP10A | DEAALVYAARAYNCVLERLHDQVS--VEL-----PHLG-RLTFELHTLCLDSVRRRMSVIRH-PL-----TDEINVYTKGADSVVMDLQPC    | 779 |
| AtALA2   | DEDAALVIAASKLHMVFVGKNNALLE--IRF-----NGSVIRYEVLEILFETSRRKRMSVVKDCQ-----NGKILLSCGADSAILPYARA     | 536 |
| AtALA10  | DEAAAVVAAREFGFEFNRTQNGIS--FREL DVS GEKVERVYRLNLVLEFNSTRKRMSVIVRD-D-----DGKLLLSCKGADNVMFERLAKN  | 628 |

|          | N domain                                                                                        | P |      |
|----------|-------------------------------------------------------------------------------------------------|---|------|
| CtDNF1   | E-----QADMRRETAQHLEMFV EGLR TLCAIERELSEEYERWRREHDLAATAL-ENREKLEEVADKIERDLTLLEGGTAIEDRLQDQVP     |   | 902  |
| CtDRS2   | N-----PHVDQTLRHLEEYASEGLR TLCLAFREVPQE FQEWYQVYDKAQTTVGGTRAQELDKAAEIEPKDFYLLGATAIEDRLQDQVP      |   | 873  |
| ScDRS2   | A-----NQVVEATMRHLEDYASEGLR TLCLAMRDISGEYEWNSIYNEAATTL-DNRAEKLDEAANLIEKNLILIGATAIEDRLQDQVP       |   | 818  |
| ScDNF1   | SG-----SNSEAI LEKTALHLEQYATEGLR TLCAIQRELSWSEYKWKNEYDIAAASL-ANRDELEVVADSIRELILLEGGTAIEDRLQDQVP  |   | 972  |
| ScDNF2   | QN-----DATALLEKTALHLEEYATEGLR TLCLAQRELTSWSEYERWVKYVDVAASV-TNREELDKVTDVIRELILLEGGTAIEDRLQDQVP   |   | 1015 |
| BtATP8A2 | S-----KYMEETLCHLEYFATEGLR TL CVAYADLSERDYEELWLVQEA STIL-KDRAQRLEECY EIEKNL LLLGATAIEDRLQDQVP    |   | 648  |
| HsATP8A1 | S-----KYKEITLKHLEQFATEGLR TL CFAVAEISESDFQEWRAVYQRASTSV-QNRLLKLEESYELIEKNLQLLGGATAIEDRLQDQVP    |   | 668  |
| HsATP8A2 | S-----KYMEETLCHLEYFATEGLR TL CVAYADLSENEYEWLVQEA STIL-KDRAQRLEECY EIEKNL LLLGATAIEDRLQDQVP      |   | 688  |
| HsATP11A | -----KVDQIRARVERNAVEGLR TL CVAYKRLIQEYEGICCKLQAAKVAL-QDREKLLAEAYEIEKNL LLLGATAIEDRLQKAA         |   | 670  |
| HsATP11C | -----EIELTKHVVERNAMDGYR TL CFAVKEIAPDDYERINRQLIEAKMAL-QDREKMEKVFDDEITNMNLIGATAIEDRLQDQAA        |   | 660  |
| HsATP8B1 | N-----PTKQETQDALDIFANETL TL CLCYKEIEKEFTEWNNKFMAASVAS-TNRDEALDKVYEEIEKDLILLLGGATAIEDRLQDQVP     |   | 715  |
| HsATP8B2 | T-----QELLNVTMDHLNEYAGEGLR TL VLAYKDLDEEYEWAEARLQASLAQ-DSREDRLASIYEEVENNMMLLGGATAIEDRLQDQVP     |   | 676  |
| HsATP10A | SSVDARGRHQKIRSKTQNYLVNVAEGLR TL CIAKRVLSKEYBACWVLSHLEAESSL-ENSEELLFQSAIRLETNLHLLGATGIEDRLQDQVP  |   | 872  |
| AtALA2   | -----GQQ-TRTIGDAVEHYSQLGLR TL CLAWRELEENEYLEWSVKFKEASSLL-VDRWRIRAEVQCQRLEHDIYILGVTAIEDRLQDQVP   |   | 619  |
| AtALA10  | -----GRQFEAKTQEHVNQYADAGL R TL VLAYREVDENEYIEFNKSFNEAKASVSEDRREALIDETDKMIRDLILLLGGATAIEDRLQDQVP |   | 713  |

|          | P domain                                                                                         |      |
|----------|--------------------------------------------------------------------------------------------------|------|
| CtDNF1   | DTIALADAGIKIWLVTGDKVETA<br>INIGFSCNLLNNDMD--LLRL-QVNESDAST-E--DDYLQLA-----E-----EQLKTN           | 969  |
| CtDRS2   | ETIHTQOEAGIKVWVLTGRQETA<br>INIGMSCKLLSDDMM--LLII-NEETAFAATR---DNIQ-----D-----KK                  | 931  |
| ScDRS2   | ETIHTQOEAGIKIWLVTGDRQETA<br>INIGMSCRLLSDDMN--LLII-NEETRDDTE---RNLL-----D-----EK                  | 876  |
| ScDNF1   | DCIELAEAGIKIWLVTGDKVETA<br>INIGFSCNLLNNDME--LLVI-KTTGDDVKEFG--SEPSEIV---D-----ALLSKY             | 1040 |
| ScDNF2   | DSIALAEAGIKIWLVTGDKVETA<br>INIGFSCNLLNNDME--LLVV-RASGEDVVEEFG--SDPIQVV---N-----NLVTKY            | 1083 |
| BtATP8A2 | ETIATLLKAEIKIWLVTGDKQETA<br>INIGYSCRLVSQNMMA--LILL-KEDSLDATR---AAIT-----D-----QH                 | 706  |
| HsATP8A1 | ETIETMKADIKIWLVTGDKQETA<br>INIGHSCKLLKKNMG--MIVI-NEGSLDGRTR---ETLS-----D-----RH                  | 726  |
| HsATP8A2 | ETIATLLKAEIKIWLVTGDKQETA<br>INIGYSCRLVSQNMMA--LILL-KEDSLDATR---AAIT-----D-----QH                 | 746  |
| HsATP11A | DTIEALQKAGIKVWVLTGDKMETAAATCYACKLFRRTNQ--LLEL-TTKRIEESQ----LH-----D-----DVLFEFSKTVLRH            | 737  |
| HsATP11C | ETIEALHAAAGLVWVLTGDKMETAKSTCYACRLFQNTTE--LLEL-TTKTIEESE--RKEDRLH-----E-----ELLIEYRKKLLHE         | 732  |
| HsATP8B1 | ETIETMKADIKIWLVTGDKQETA<br>ENIGFACELLTDETT--IC-YGE-DI-N-----SL-----L-----HARMEN                  | 771  |
| HsATP8B2 | ETIATLLANIKIWLVTGDKQETA<br>AVNIGYSCKMLTDDMT--EVFIVTGHVTVLEVR--EELRKA-----R-----EKMMDS            | 742  |
| HsATP10A | ETISKRRQAGLQIWLVTGDKQETA<br>VNIAYACKLLDHDEE--VITL-NATSQEACA---ALLDQCLCYVQSRGLQRAPEKTK-----GKVSMR | 953  |
| AtALA2   | ETIETERRAGINWVLTGDKQNTAIQIALSCNFISSPEPKGQAIQIAL--DGKTEEDVS---RSLERLV-----D-----HARMEN            | 680  |
| AtALA10  | ECIDKLAQAAGIKIWLVTGDKMETAA<br>INIGFASSLLRQEMK--QII-NLETPQIKSLEKSGGKDEIE-----LASR-----ESVVMQ      | 786  |

|          | P domain                                                                                          |      |
|----------|---------------------------------------------------------------------------------------------------|------|
| CtDNF1   | L-ERFNMGTGDEELK--RARKDHNAPSPTYALVLDGFTLRWVL-----S-----DSLKQKFL                                    | 1018 |
| CtDRS2   | LDAIR-----AQEHGTVEMGTLALVLDGKSLTYAL-----E-----RDLEKMFLL                                           | 970  |
| ScDRS2   | INALN-----EHQLSTHDMNTLALVLDGKSLGFAL-----E-----PELEDYLL                                            | 915  |
| ScDNF1   | LKEYFNLTGSEEEIF--EAKKDHEFPKGNVAIVLDGDAKLLAL-----YG-----EDIRKFFL                                   | 1091 |
| ScDNF2   | LREKFGMSGSEBELK--EAKREHGLPQGNFAVLDGDAKVAL-----NG-----EMRRKFFL                                     | 1134 |
| BtATP8A2 | CADL-----GSLLGKENDAALLDGHTLKYAL-----S-----FEVRRSFL                                                | 742  |
| HsATP8A1 | CTTL-----GDALRKENDFALLIDGHTLKYAL-----T-----FCVRRYFL                                               | 762  |
| HsATP8A2 | CTDL-----GNLLGKENDVALLDGHTLKYAL-----S-----FEVRRSFL                                                | 782  |
| HsATP11A | SGSLT-----R-----DNLSGLSADMDQYGLLDGCAALSLIM-----K-----KPREDDSGSGNYRBLFL                            | 785  |
| HsATP11C | FP-KS-----T-----RSFKKAWTHEQEYGLLDGHTLKYAL-----S-----NSSQDSSSNYKSLFL                               | 779  |
| HsATP8B1 | QRNRGGVY--AKFAPPV--QESFFPPGGNRAILDTGSLWNEILLEKTKRKNILKLFKPRTEEBERRMTQSKRRLEAKK-----E-----EQRQKNFV | 854  |
| HsATP8B2 | SRSVGNQFTYQDKLSSKLSVLEAVAGEYALVINGHSLLAHAL-----E-----ADMELEFL                                     | 794  |
| HsATP10A | FSSLC-----P--PSTSTASGRRPSLVDIGRSLAYAL-----E-----KNLEDKFL                                          | 992  |
| AtALA2   | -----L-----LTMTRITASEPKDVAFVLDGWALEIAL-----K-----H-HRDKFV                                         | 714  |
| AtALA10  | LQEGK-----ALLAASGASSEAFALLIDGKSLTYAL-----E-----DEIKKMFLL                                          | 826  |

|          | P domain                                                                                            | TM5 |      |
|----------|-----------------------------------------------------------------------------------------------------|-----|------|
| CtDNF1   | LLCKQCKSVLCCRVSPKQAAAVVSMVKNGL-DVMTLSIGDGDANDVAMIQEADVGVGIGAGEEGRQAVMSSDFAIGQFRFLRQLRVLVHGRWSVRRLL  |     | 1111 |
| CtDRS2   | DLAAMCKAVLCCRVSPKQAAAVVSMVKNGL-DVMTLSIGDGDANDVAMIQEADVGVGIGAGEEGRQAVMSSDFAIGQFRFLRQLRVLVHGRWSVRRLL  |     | 1064 |
| ScDRS2   | TVAKLCKAVLCCRVSPKQAAAVVSMVKNGL-DVMTLSIGDGDANDVAMIQEADVGVGIGAGEEGRQAVMSSDFAIGQFRFLRQLRVLVHGRWSVRRLL  |     | 1008 |
| ScDNF1   | LLCKNCKAVLCCRVSPKQAAAVVSMVKNGL-DVMTLSIGDGDANDVAMIQEADVGVGIGAGEEGRQAVMSSDFAIGQFRFLRQLRVLVHGRWSVRRLL  |     | 1184 |
| ScDNF2   | LLCKNCKAVLCCRVSPKQAAAVVSMVKNGL-DVMTLSIGDGDANDVAMIQEADVGVGIGAGEEGRQAVMSSDFAIGQFRFLRQLRVLVHGRWSVRRLL  |     | 1227 |
| BtATP8A2 | DLALSCKAVLCCRVSPKQAAAVVSMVKNGL-DVMTLSIGDGDANDVAMIQEADVGVGIGAGEEGRQAVMSSDFAIGQFRFLRQLRVLVHGRWSVRRLL  |     | 835  |
| HsATP8A1 | DLALSCKAVLCCRVSPKQAAAVVSMVKNGL-DVMTLSIGDGDANDVAMIQEADVGVGIGAGEEGRQAVMSSDFAIGQFRFLRQLRVLVHGRWSVRRLL  |     | 855  |
| HsATP8A2 | DLALSCKAVLCCRVSPKQAAAVVSMVKNGL-DVMTLSIGDGDANDVAMIQEADVGVGIGAGEEGRQAVMSSDFAIGQFRFLRQLRVLVHGRWSVRRLL  |     | 875  |
| HsATP11A | EICRSCAVLCCRVSPKQAAAVVSMVKNGL-DVMTLSIGDGDANDVAMIQEADVGVGIGAGEEGRQAVMSSDFAIGQFRFLRQLRVLVHGRWSVRRLL   |     | 879  |
| HsATP11C | QICCMKTAFLCCRVSPKQAAAVVSMVKNGL-DVMTLSIGDGDANDVAMIQEADVGVGIGAGEEGRQAVMSSDFAIGQFRFLRQLRVLVHGRWSVRRLL  |     | 873  |
| HsATP8B1 | DLACECAVILCCRVSPKQAAAVVSMVKNGL-DVMTLSIGDGDANDVAMIQEADVGVGIGAGEEGRQAVMSSDFAIGQFRFLRQLRVLVHGRWSVRRLL  |     | 947  |
| HsATP8B2 | ETACACKAVLCCRVSPKQAAAVVSMVKNGL-DVMTLSIGDGDANDVAMIQEADVGVGIGAGEEGRQAVMSSDFAIGQFRFLRQLRVLVHGRWSVRRLL  |     | 887  |
| HsATP10A | ANMLVYFYFNKNVLYLIIELWFAFVNGFSGQLILFERWCIGLYNVIFLTPPTLGFIFERSCSQESMLRFPQLYKITQNAEGFNKTVFWGHGINAL     |     | 1085 |
| AtALA2   | ELAILSRATLCCRVSPKQAAAVVSMVKNGL-DVMTLSIGDGDANDVAMIQEADVGVGIGAGEEGRQAVMSSDFAIGQFRFLRQLRVLVHGRWSVRRLL  |     | 806  |
| AtALA10  | DLATSCASVILCCRVSPKQAAAVVSMVKNGL-DVMTLSIGDGDANDVAMIQEADVGVGIGAGEEGRQAVMSSDFAIGQFRFLRQLRVLVHGRWSVRRLL |     | 919  |

|          | TM5 cont.                                                                                       | TM6 | TM7 |      |
|----------|-------------------------------------------------------------------------------------------------|-----|-----|------|
| CtDNF1   | AETISNFYFNKNVLYLIIELWFAFVNGFSGQLILFERWCIGLYNVIFLTPPTLGFIFERSCSQESMLRFPQLYKITQNAEGFNKTVFWGHGINAL |     |     | 1205 |
| CtDRS2   | SKTILFVFNKNVLYLIIELWFAFVNGFSGQLILFERWCIGLYNVIFLTPPTLGFIFERSCSQESMLRFPQLYKITQNAEGFNKTVFWGHGINAL  |     |     | 1158 |
| ScDRS2   | SVAILYVFNKNVLYLIIELWFAFVNGFSGQLILFERWCIGLYNVIFLTPPTLGFIFERSCSQESMLRFPQLYKITQNAEGFNKTVFWGHGINAL  |     |     | 1102 |
| ScDNF1   | AEMIPQFVFNKNVLYLIIELWFAFVNGFSGQLILFERWCIGLYNVIFLTPPTLGFIFERSCSQESMLRFPQLYKITQNAEGFNKTVFWGHGINAL |     |     | 1278 |
| ScDNF2   | AEMIPQFVFNKNVLYLIIELWFAFVNGFSGQLILFERWCIGLYNVIFLTPPTLGFIFERSCSQESMLRFPQLYKITQNAEGFNKTVFWGHGINAL |     |     | 1321 |
| BtATP8A2 | TKCILYVFNKNVLYLIIELWFAFVNGFSGQLILFERWCIGLYNVIFLTPPTLGFIFERSCSQESMLRFPQLYKITQNAEGFNKTVFWGHGINAL  |     |     | 929  |
| HsATP8A1 | SKCILYVFNKNVLYLIIELWFAFVNGFSGQLILFERWCIGLYNVIFLTPPTLGFIFERSCSQESMLRFPQLYKITQNAEGFNKTVFWGHGINAL  |     |     | 949  |
| HsATP8A2 | TKCILYVFNKNVLYLIIELWFAFVNGFSGQLILFERWCIGLYNVIFLTPPTLGFIFERSCSQESMLRFPQLYKITQNAEGFNKTVFWGHGINAL  |     |     | 969  |
| HsATP11A | SELVQYVFNKNVLYLIIELWFAFVNGFSGQLILFERWCIGLYNVIFLTPPTLGFIFERSCSQESMLRFPQLYKITQNAEGFNKTVFWGHGINAL  |     |     | 973  |
| HsATP11C | AHLVQYVFNKNVLYLIIELWFAFVNGFSGQLILFERWCIGLYNVIFLTPPTLGFIFERSCSQESMLRFPQLYKITQNAEGFNKTVFWGHGINAL  |     |     | 967  |
| HsATP8B1 | CKFLRYVFNKNVLYLIIELWFAFVNGFSGQLILFERWCIGLYNVIFLTPPTLGFIFERSCSQESMLRFPQLYKITQNAEGFNKTVFWGHGINAL  |     |     | 1041 |
| HsATP8B2 | CKFLCYVFNKNVLYLIIELWFAFVNGFSGQLILFERWCIGLYNVIFLTPPTLGFIFERSCSQESMLRFPQLYKITQNAEGFNKTVFWGHGINAL  |     |     | 981  |
| HsATP10A | ANMLVYFYFNKNVLYLIIELWFAFVNGFSGQLILFERWCIGLYNVIFLTPPTLGFIFERSCSQESMLRFPQLYKITQNAEGFNKTVFWGHGINAL |     |     | 1179 |
| AtALA2   | AELSQVYFNKNVLYLIIELWFAFVNGFSGQLILFERWCIGLYNVIFLTPPTLGFIFERSCSQESMLRFPQLYKITQNAEGFNKTVFWGHGINAL  |     |     | 899  |
| AtALA10  | ASMICYVFNKNVLYLIIELWFAFVNGFSGQLILFERWCIGLYNVIFLTPPTLGFIFERSCSQESMLRFPQLYKITQNAEGFNKTVFWGHGINAL  |     |     | 1013 |

|          | TM7 cont.                                                                                         | TM8 | TM9 |      |
|----------|---------------------------------------------------------------------------------------------------|-----|-----|------|
| CtDNF1   | YQSVMSFFLFFIFVVLTPAAAGNDVSRTRLGAYIAHPAVITINGYLINTYRWDLWMLLSIVLSVDFIFF----W-TGV-Y-TATTYSAG         |     |     | 1291 |
| CtDRS2   | YHSILLYIGGSLFF-LGVQ-NABGFPAG-KWVWGTYMGAVLLTVLGKAALVTNNWTKWHVVGIPGSMLFVLV-FVGVY-GTV-A-PKLGFSME     |     |     | 1245 |
| ScDRS2   | FHSADVIFIGTILYRYGFALNMHGELAD-HWSVGVVYVTSVIIIVLKGAAALVTNQWTKFTLIAIPGSLFLWLI-FFPIY-ASI-F-PHANIARE   |     |     | 1191 |
| ScDNF1   | YQSVIICFFFPYLIVYHKMNVTSTNGLGDHRYFVGVVYVTTAVISCNVYVLLHQYRWDFWGLFIALSCLVFA----W-TGI-W-SSAIASRE      |     |     | 1364 |
| ScDNF2   | YQSVIICFFFPYLIVYHKMNVTSTNGLGDHRYFVGVVYVTTAVISCNVYVLLHQYRWDFWGLFIALSCLVFA----W-TGI-W-TSSSSNE       |     |     | 1407 |
| BtATP8A2 | VHSLLILFWFPMKALEHDT-VLANGHATD-YLFVGNVYVTVVVVVCLKAGLETWTAWTKFHSILAVWGSMLIWLW-FFGIY-STI-W-PTIPIAPD  |     |     | 1017 |
| HsATP8A1 | FHSVILFWFPMKALQYGT-AFGNGKTSY-DYLLGNVYVTVVVVVCLKAGLETWYWTWFSHIAIWGSIALWVW-FFGIY-SSL-W-PAIPMAPD     |     |     | 1037 |
| HsATP8A2 | VHSLLILFWFPMKALEHDT-VLANGHATD-YLFVGNVYVTVVVVVCLKAGLETWTAWTKFHSILAVWGSMLTWLW-FFGIY-STI-W-PTIPIAPD  |     |     | 1057 |
| HsATP11A | FDALVFFFGAYFVEENT-VTSNQIFG-NWTFGTIVTVMVVFVCLKAGLETWYWTWFSHIAIWGSIALWVW-FFGIY-SSL-W-PAIPMAPD       |     |     | 1061 |
| HsATP11C | FEGTVFFFGTYFLFQTAS-LEENGKVG-NWTFGTIVTVMVVFVCLKAGLETWYWTWFSHIAIWGSIALWVW-FFGIY-SSL-W-PAIPMAPD      |     |     | 1055 |
| HsATP8B1 | LTSMLIFLFFLGAYLQTV-QGGEAPS-D-YQSPAVTASALVITVNVQIGLDTSYWTFVNAFISFGSIALYFGIMDFHSAHG-H-VLFPFSAFQ     |     |     | 1131 |
| HsATP8B2 | YTSVMEFFFPYGVFADAT-RDDGTQLAD-YQSPAVTASALVITVNVQIGLDTSYWTFVNAFISFGSIALYFGIMDFHSAHG-H-VLFPFSAFQ     |     |     | 1071 |
| HsATP10A | FQSLVCFSPYLLAYYDSN-----VD-LFTWGTPIVITIALTFLHLGIEIKTWTLNWTICGFSVLLFET-VALIY-NAS-CATCYPP-SN         |     |     | 1260 |
| AtALA2   | FHAIIVFVITIHAYAEK-----SE-MEELGMVALSGCIWQAFVVAQETNSFTVVLQHLSIWGNLVGFYA-INFLF-SA-----IPS-SG         |     |     | 975  |
| AtALA10  | ISALATIFFLCKESLKHQL-FDPPDGKTAG-REILGGTMYTCVVVWVNLQMALISISYFTWVQHVIVWGSIAFWYI-FLMIY-GAM-T-PSF-S-TD |     |     | 1099 |



TM10

CtDNF1 FYQA-APQVYQELTFWMLIVTPALCLLPRLLVVKCIQKQRFPYDVDIIREQAN--R--GDFAAAD-----AAAV-----AALGGPE 1362  
 CtDRS2 FFEV-IPRLFSNPSFWLQMPTLAILCLARDFAWKFSKRLWKPEAYHHVQEIQK--Y--NI----- 1300  
 ScDRS2 YYGV-VKHTYGSVFWLTLIVLPIFALVDRFLWKYKRMYPETVHYVQEMQK--Y--NI----- 1246  
 ScDNF1 FFKA-AARIYGAPSFVAVFFVAVLFCLLPRFTYDSQKFFYPPTDVEIVREMWO--H--GHFDHYP-----PGYDPTDPRPKVTKAGQHGEK 1446  
 ScDNF2 FYKG-AARVFAQPAYWAVLFGVGLFCLLPRFTIDCIRKIFYPKDIEIVREMWL--R--GDFDLYP-----QGYDPTDPSRPRINEIRPLT-D 1488  
 BtATP8A2 MKGQ-ATMVLSSAHFWLGLFLVPTACLIEDVAWRAAKHTCKKTLLEEVQEM--K--SR----- 1072  
 HsATP8A1 MSGE-AAMLFSGGVFWMGLLFIPVASLLLDVVYKVIKRTAFKTLVDEVQELEA--K--SQ----- 1092  
 HsATP8A2 MRGQ-ATMVLSSAHFWLGLFLVPTACLIEDVAWRAAKHTCKKTLLEEVQELT--K--SR----- 1112  
 HsATP11A MYVY-FIQMLSSGPAWLAIVLLVTISLLPDVLKVKLQRLWPTATERVQTKSQ--C--LSVE----- 1118  
 HsATP11C MYFV-FAQMLSSVSTWLAIIILLIFISLFFPELLIVLKNVRRRSARRNLSCRRASDS--LSAR----- 1114  
 HsATP8B1 FTGT-ASNALRQPYIWLTIILAVAVCLLPPVAIRFLSMTIWPESDKIQKHKR--R--LK----- 1186  
 HsATP8B2 FVGN-AQNTLAQPTVWLTIVLTTVVCIMPVAVFRFLRLNLKPDLSDTVRYTQL--VRKKQK----- 1129  
 HsATP10A PYWT-MQALLGDPVFYLTCLMTPVAALLPRLFFRSLOGRVFPPTQLQLARQLTR--K--SPRCSAPKETFAQGRLPKDS----- 1334  
 AtALA2 MYTI-MFRLCSQPSYNTMFLIVGAGMGPIFALKYFRYTYRPSKINILQQAER--M--GGPIL-----TLG----- 1036  
 AtALA10 AYMVFLEALAPAPSYWLTTLFVMIFFALIPYFVYKSVQMRFFPKYHQMIQWIRY--E--GHSN----- 1157

CtDNF1 RVEGESLG-SLSSSGKSGRSKSKKHQQYASVDEDRRPIYPPSIATHNTRAQNGSD-----GTT----- 1420  
 CtDRS2 ----- 1420  
 ScDRS2 ----- 1420  
 ScDNF1 IIEGIALSDNL---GGSNYSR-----DSVVTTEEIPMTF-MH-----GED-----GSPSGYQKQETW-----M 1494  
 ScDNF2 FKEPISLDTHF---DGVSHSQ-----ETIVTEEIPMSI-LN-----GEQ-----GSRKGYRVSTTLERRDQLSPVTTTN 1548  
 BtATP8A2 ----- 1420  
 HsATP8A1 ----- 1420  
 HsATP8A2 ----- 1420  
 HsATP11A ----- 1420  
 HsATP11C ----- 1420  
 HsATP8B1 ----- 1420  
 HsATP8B2 ----- 1420  
 HsATP10A ---GT---EHSSGR-----TV-KTSVPLSQPS-----WHTQQPVCSEASGEPSS----- 1371  
 AtALA2 ---N---IETQPR-----TIEKDLSPISITQ-----PKNRSPVY----- 1064  
 AtALA10 -----DPE----- 1160

CtDNF1 -----YIMQSRTS-----TELQQEMPFDREETPAVR-PSIERTRPSYDRIRR--SIDRVRPSEASNDFT 1480  
 CtDRS2 -----QDYRP-----RME---QFQK---AIRKVR----- 1318  
 ScDRS2 -----SDSRP-----HVQ---QFQN---AIRKVR----- 1264  
 ScDNF1 TSPKETQDLLQSPQFQQAQTFG-----R-----GPSTNVRS--SLDRTREQMIATNQLD 1541  
 ScDNF2 NLPRRSMASAR-----G--NKLRT--SLDRTREEMLANHQLD 1581  
 BtATP8A2 -----VMGRAMLR-DSNGKRMNERDRLK--RLSRKTP----- 1102  
 HsATP8A1 -----DPGAVVL-----GKSLTERAQLLK--NVFKKNH----- 1118  
 HsATP8A2 -----VLGKAVLR-DSNGKRLNERDRLIK--RLGRKTP----- 1142  
 HsATP11A -----QSTI----- 1122  
 HsATP11C -----PSVR----- 1118  
 HsATP8B1 -----AE-----EQWQRROQVFR----- 1199  
 HsATP8B2 -----AQ-----HRCMR--RVGR----- 1140  
 HsATP10A -----TVDMSPVREHTLLEGLSAP-APMSSAPGEAVLR-SPGGCPEESKVR-A--STGRVTP----- 1425  
 AtALA2 -----EP-----LLSDSPN-ATR-----R--SFGPGTP----- 1084  
 AtALA10 -----FV-----EMVRQR-SIRPTTVGYTARR-AA----- 1183

CtDNF1 SAARL-----SRIESTHSSL--GHTYSHQRESYAG--ESSGAQQGQEP--QORRFNLATVRKRGLSAFSSKKSIDTT--EGE----- 1548  
 CtDRS2 -----QVQRM--RKQRGYAFSMA--DE-----SQTR--VLQAY-----DTT--RHR----- 1351  
 ScDRS2 -----QVQRM--KKQRGYAFSQA--EEG-----GQEK--IVRMY-----DTT--QKR----- 1298  
 ScDNF1 NRYSV-----ERARTSL-----DL-----PGVTN-----A-----ASL-----I--GTQ----- 1568  
 ScDNF2 TRYSV-----ERARASL-----DL-----PGINH-----A-----ETL-----L--SQR----- 1608  
 BtATP8A2 --PT-L-----FRGSSLQQSMPHGYAFSQE--EHGA--V-----TQEE--IVRAY-----DTT--KQK----- 1144  
 HsATP8A1 --VN-L-----YRSESLQQNLLHGAYAFSQD--ENGI--V-----SQSE--VIRAY-----DTT--KQR----- 1160  
 HsATP8A2 --PT-L-----FRGSSLQQGVPHGYAFSQE--EHGA--V-----SQEE--VIRAY-----DTT--KKK----- 1184  
 HsATP11A --FML-S-----QTSSS-----LSF----- 1134  
 HsATP11C --PLL-L-----RTFSD-----ESN-----VL----- 1132  
 HsATP8B1 -----RGVST--RRSAYAFSHQ--RGYADLI-----SSGRSIRKKRS-----PLDAIVADGTAE-- 1244  
 HsATP8B2 -----T-GSRRSGYAFSHQ--EGFGELI-----MSGKNMRLSSL-----ALSSFTTRSSSSWI 1185  
 HsATP10A --LSSLFSLPTFSLNWISSWLVSRRLGSLVQLQFSRT--EQLADGQ--AGRG-----L-----PVQ--PHS----- 1477  
 AtALA2 --FE-F-----FQSQSR--LSSSSGYTRNCK--D----- 1106  
 AtALA10 -----SV-----RRS----- 1188

CtDNF1 ----PPREP-----PM----- 1555  
 CtDRS2 ----GR-YGEMAS-----SRT-IGI-----AQ----- 1367  
 ScDRS2 ----GK-YGELQDASANPFNDNGLGNSDFESAEPFIENPFADGNQNSNRFFSSSRDDI-----SF-DI--- 1355  
 ScDNF1 ----Q-N-N----- 1571  
 ScDNF2 ----S-RDR----- 1612  
 BtATP8A2 ----SR-KK----- 1148  
 HsATP8A1 ----PD-EW----- 1164  
 HsATP8A2 ----SR-KK----- 1188  
 HsATP11A ----- 1148  
 HsATP11C ----- 1164  
 HsATP8B1 --YR-R-TGD-----S----- 1251  
 HsATP8B2 ESLRRK-KSDSAS-----SPS-GGA-----DK-PLKG- 1209  
 HsATP10A ----GR-SG-----L-QGPDHRLLIASSRRSQ 1499  
 AtALA2 -----N----- 1107  
 AtALA10 ----AR-FHDQIY-----KDL-VGV----- 1202



Fig S2

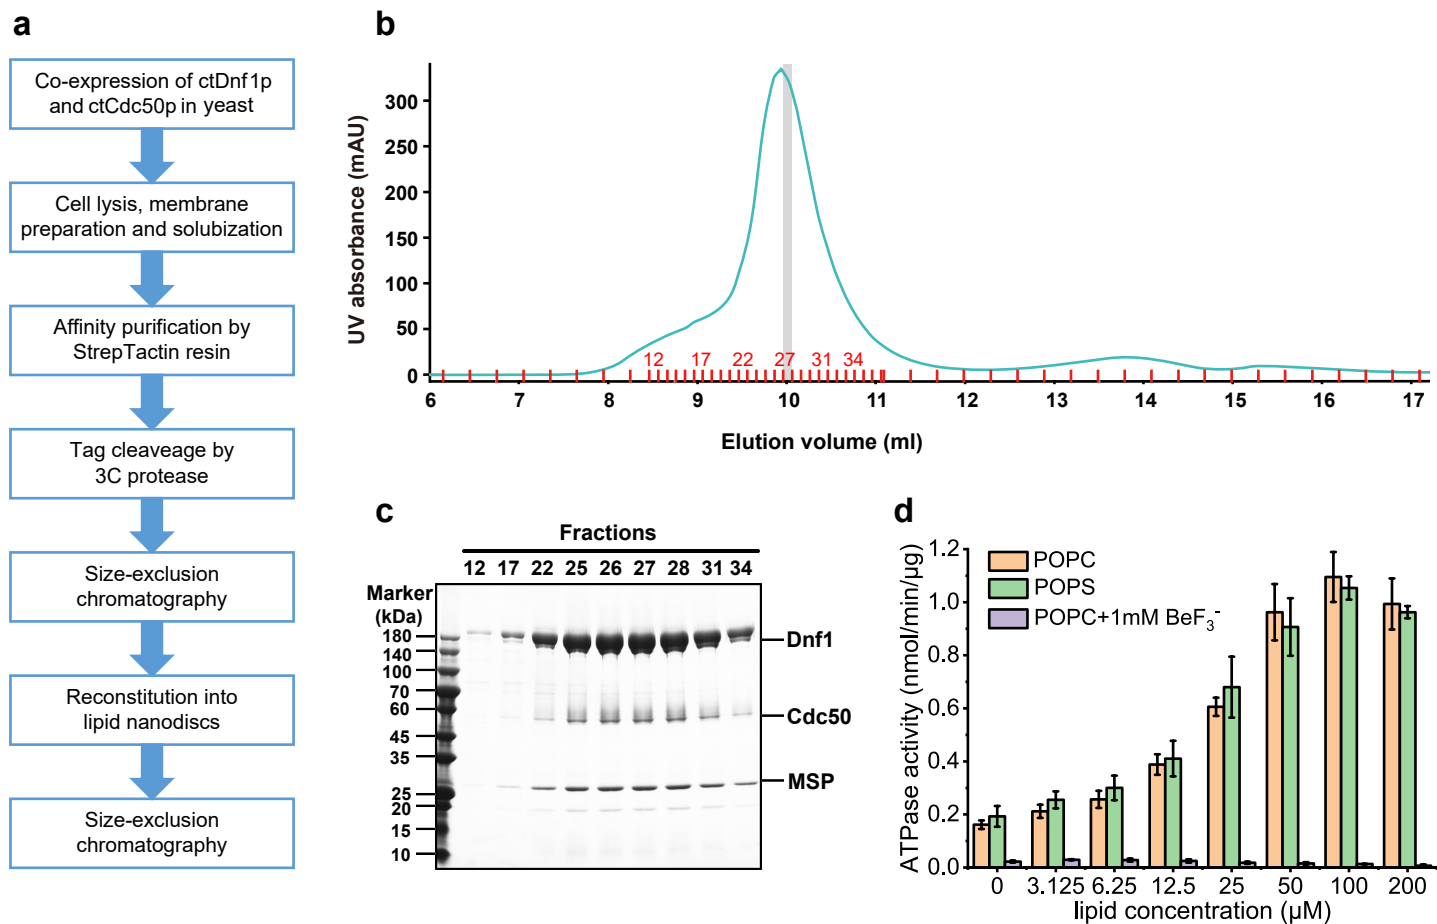

Fig S3

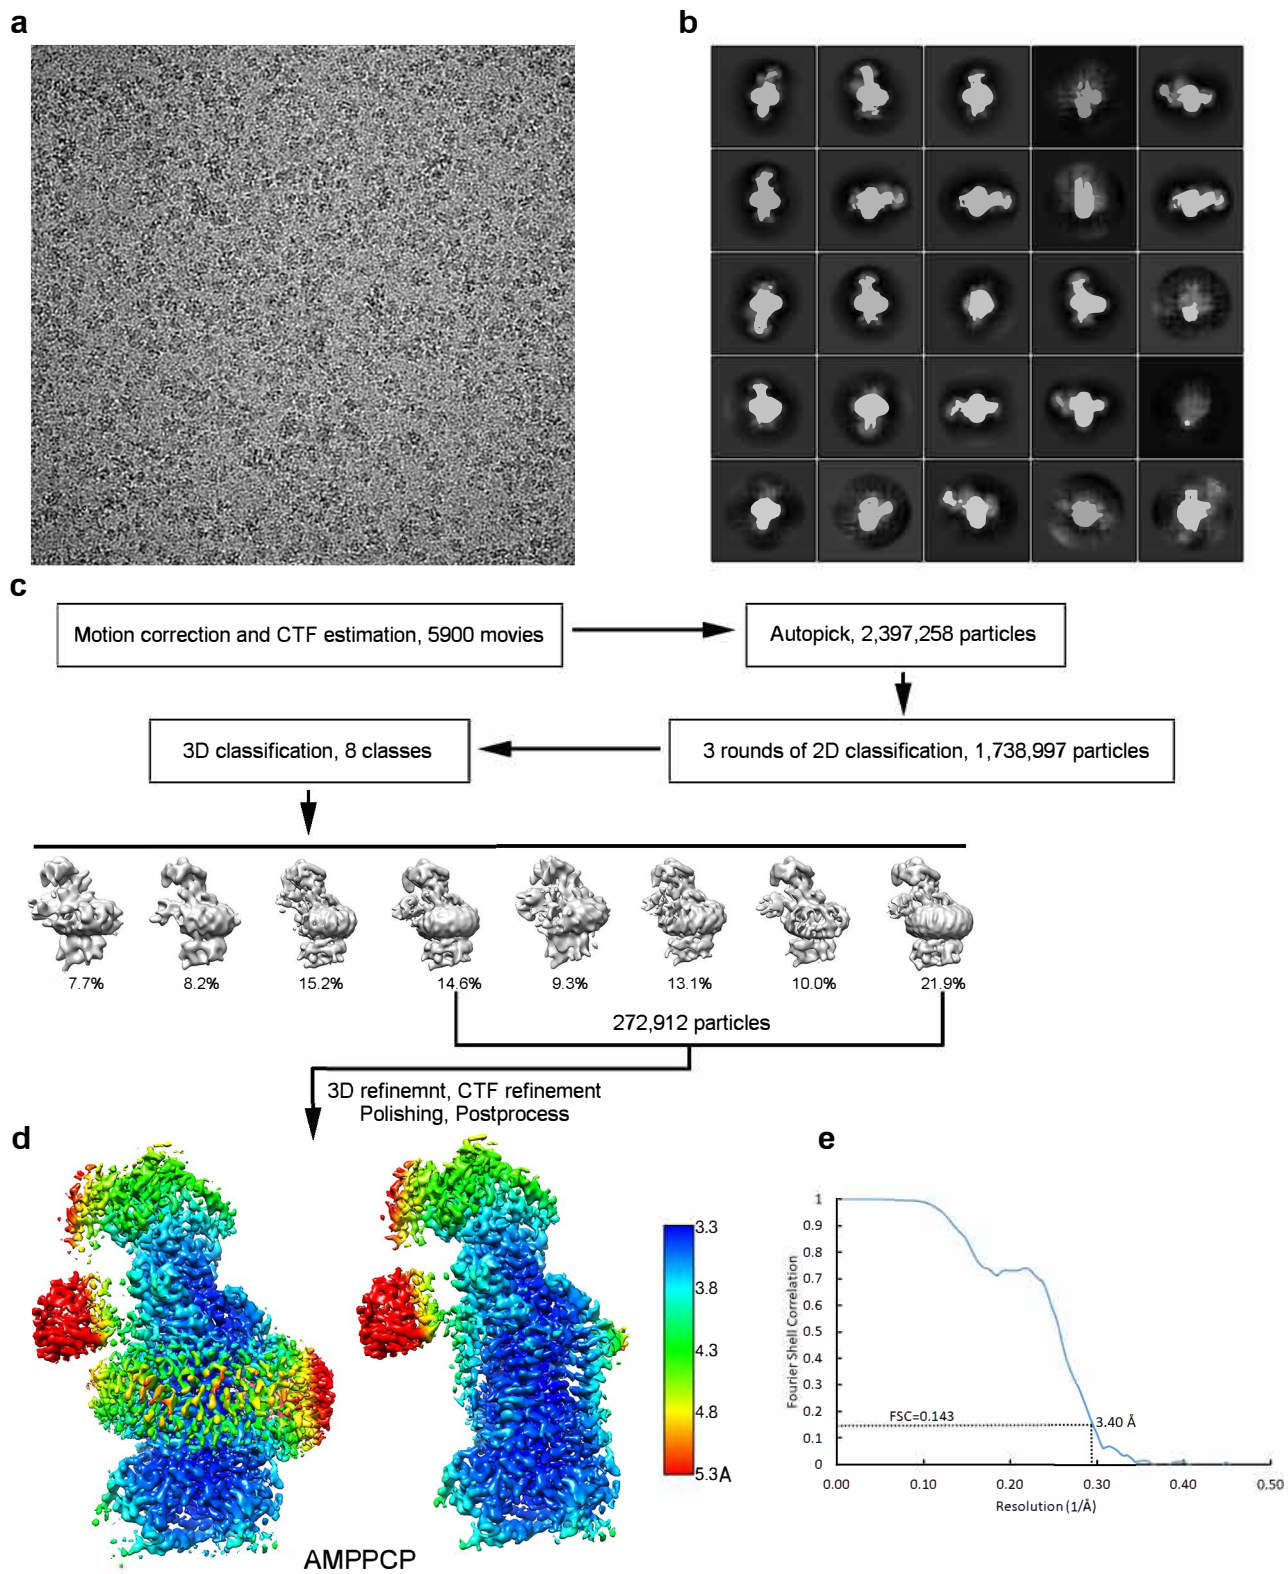

Fig. S4

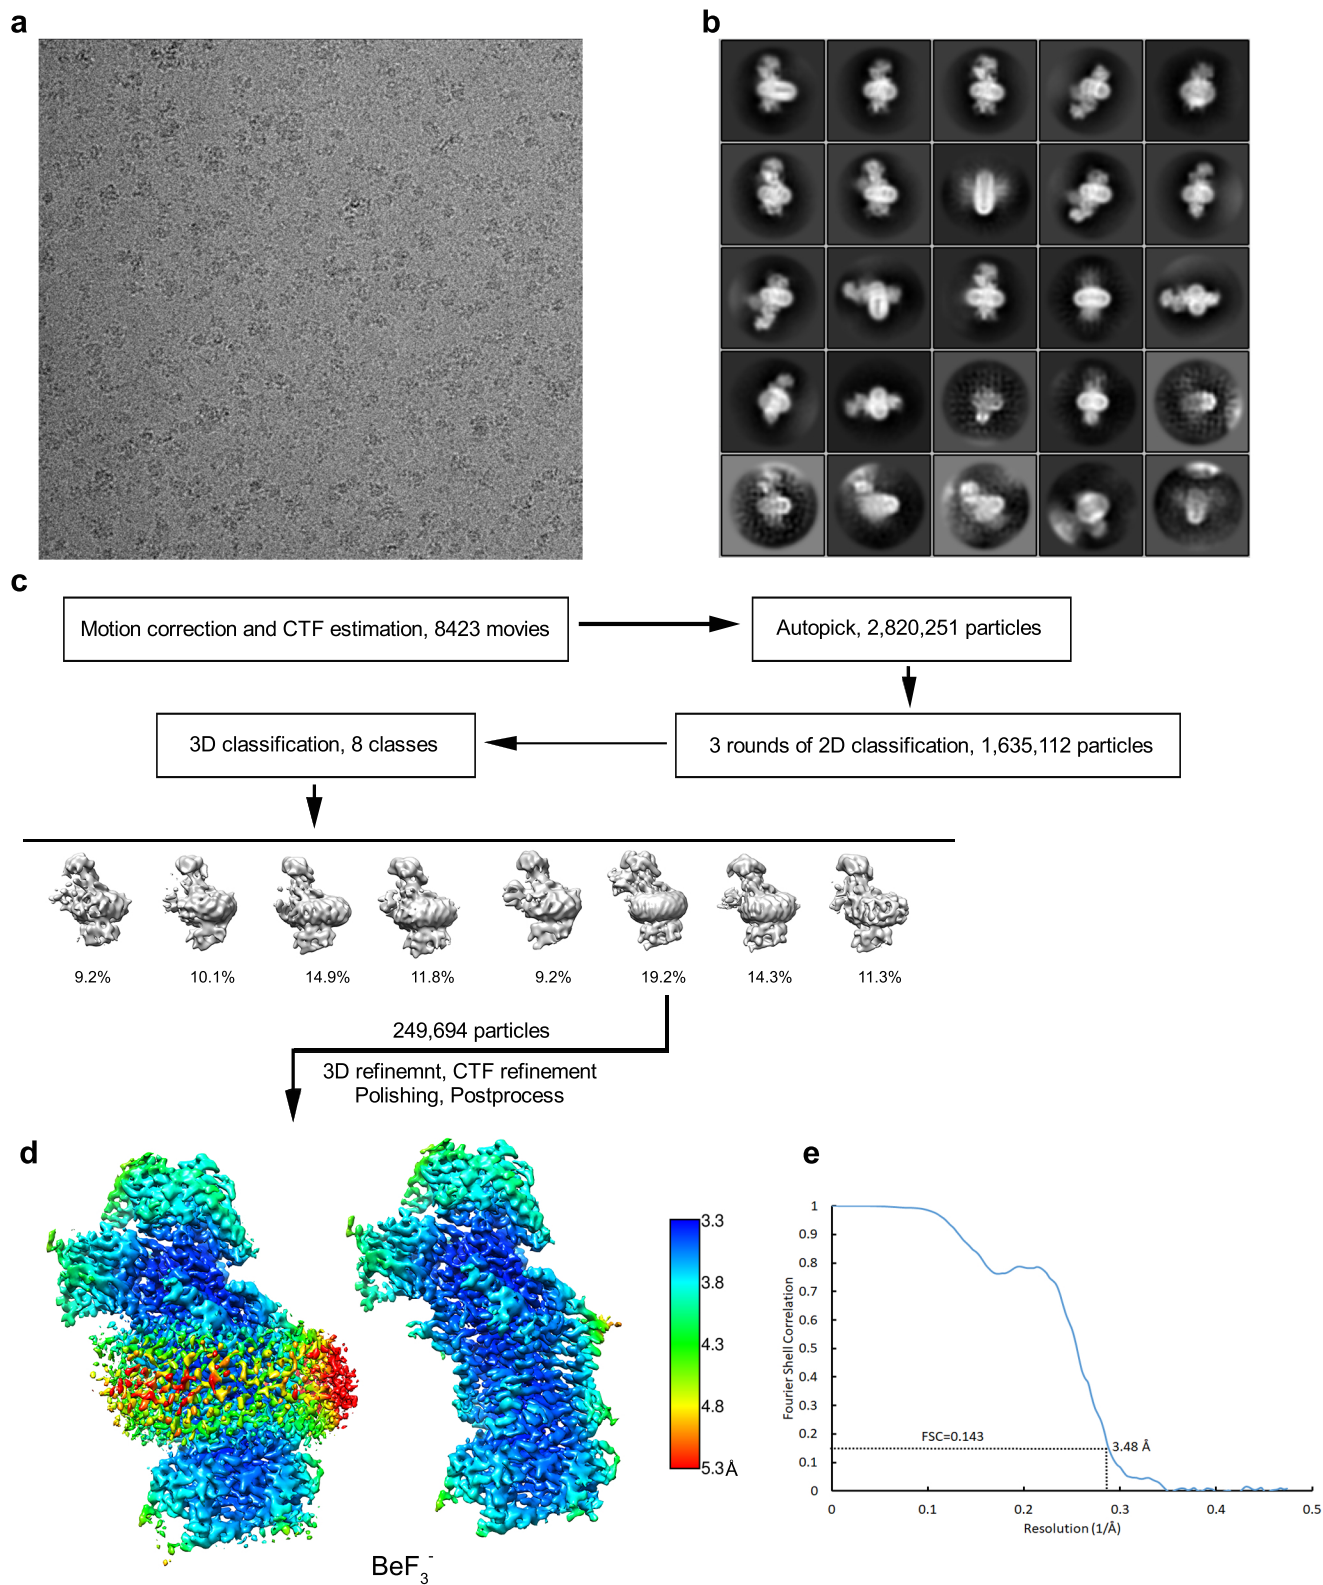

Fig. S5

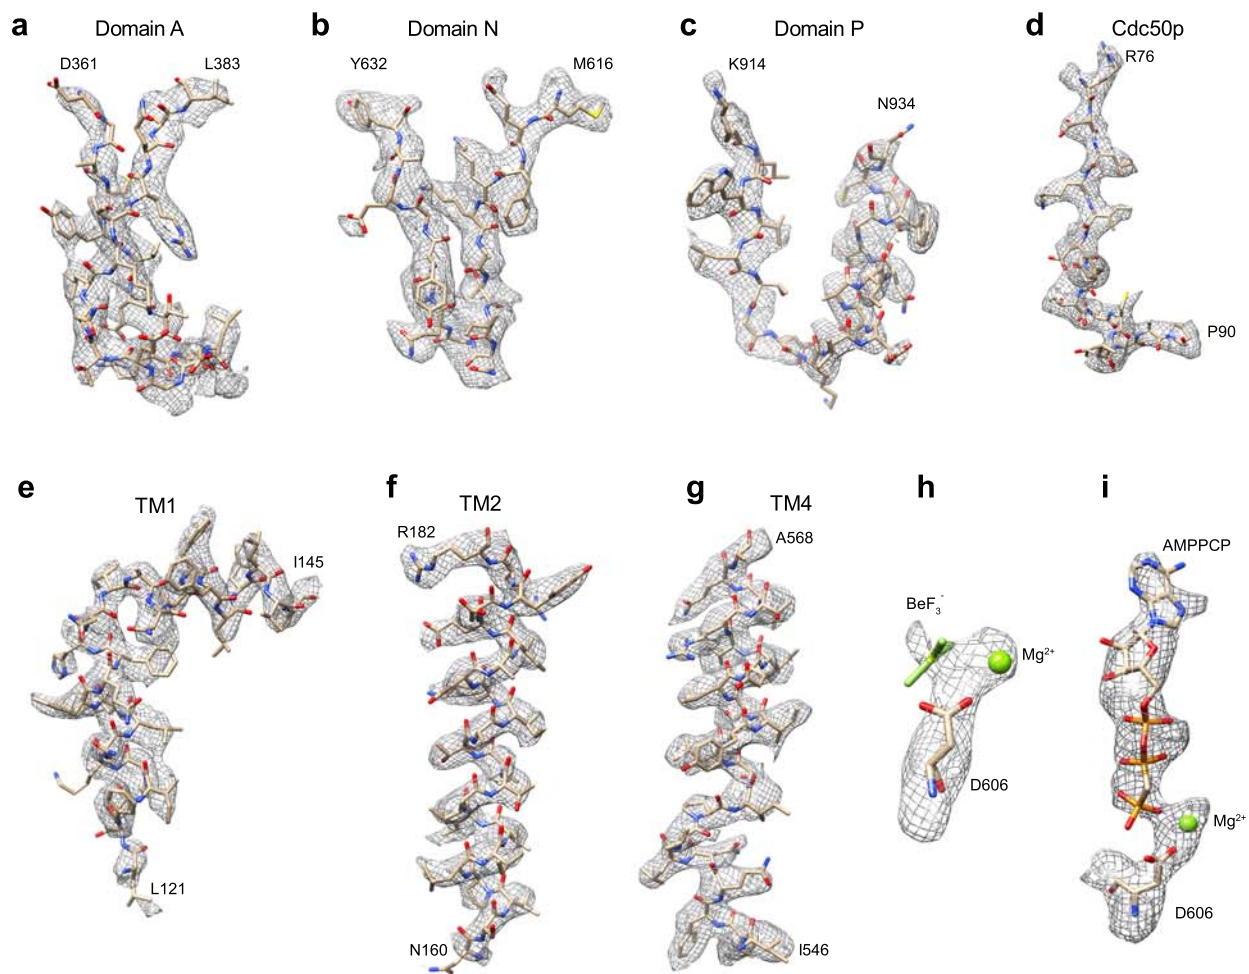



Fig. S6

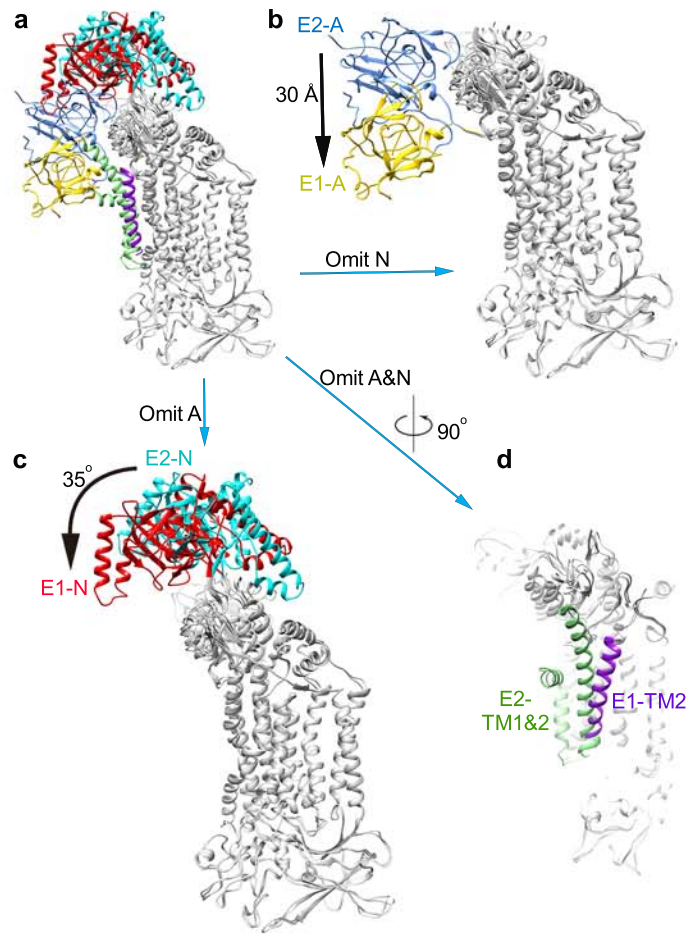

Fig. S7

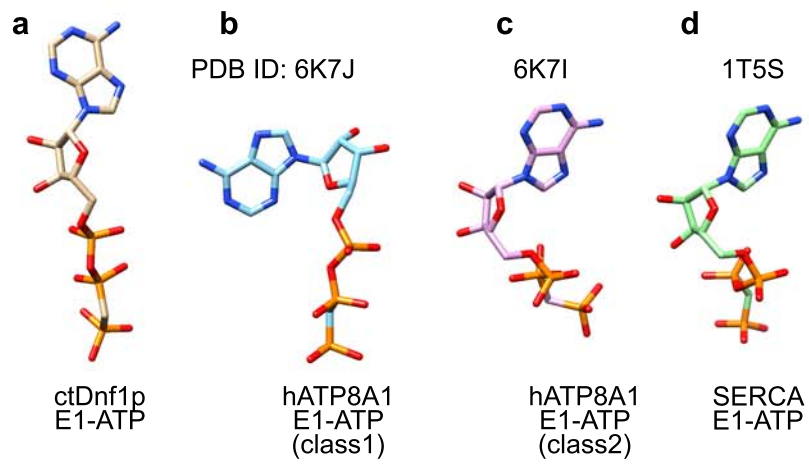

Fig. S8

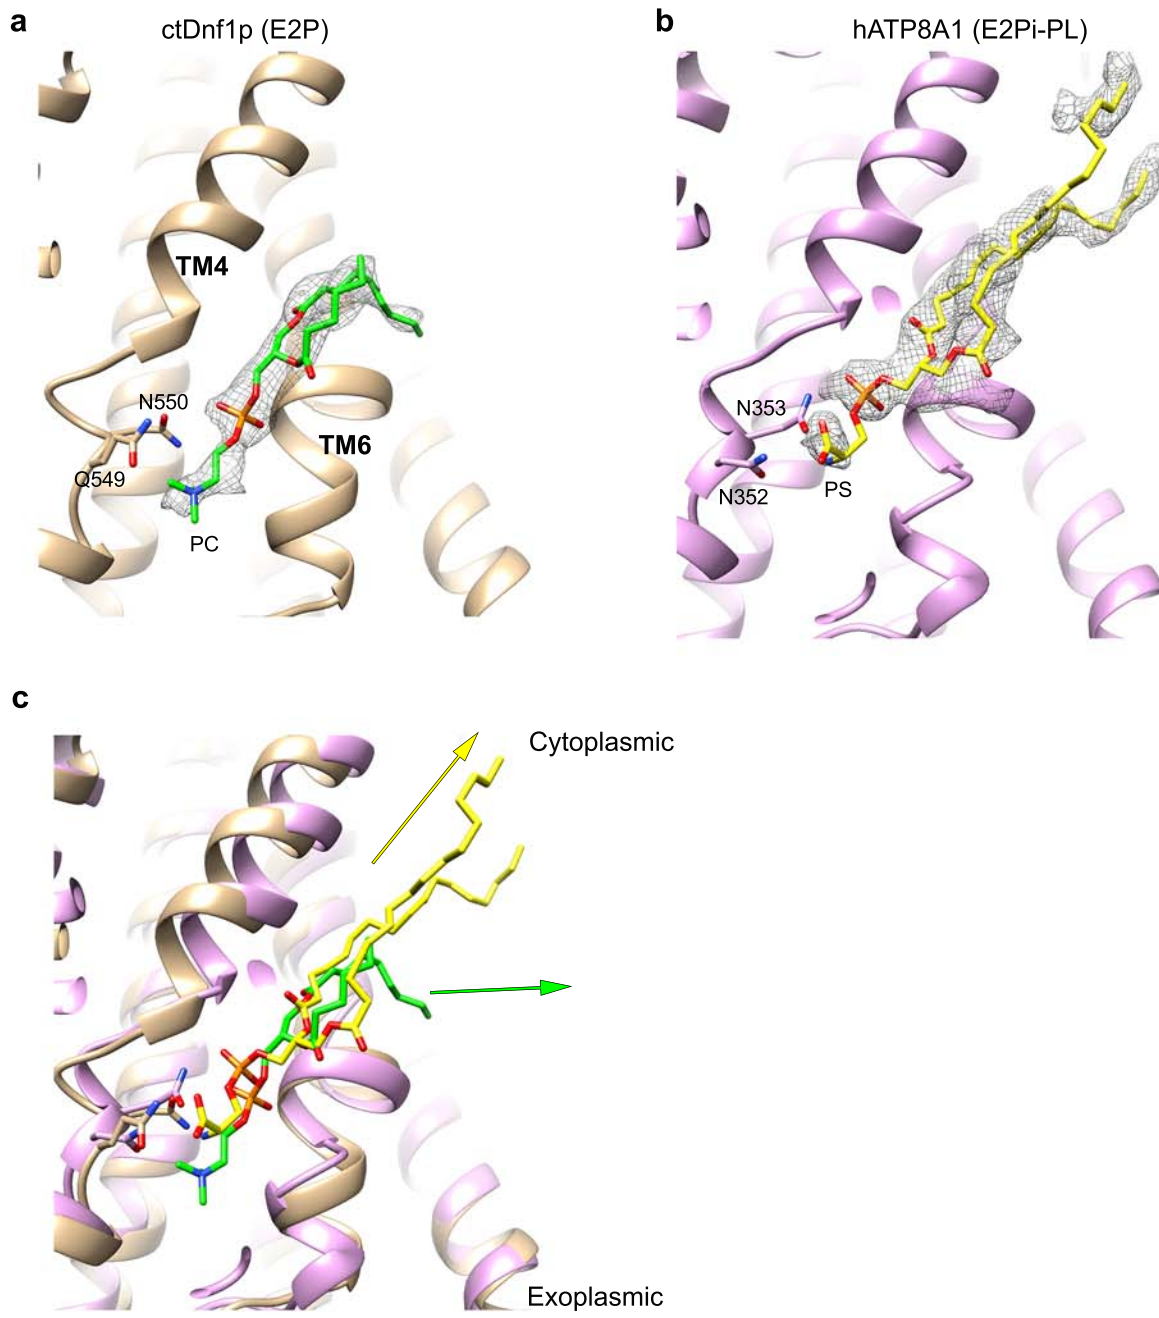

Fig. S9

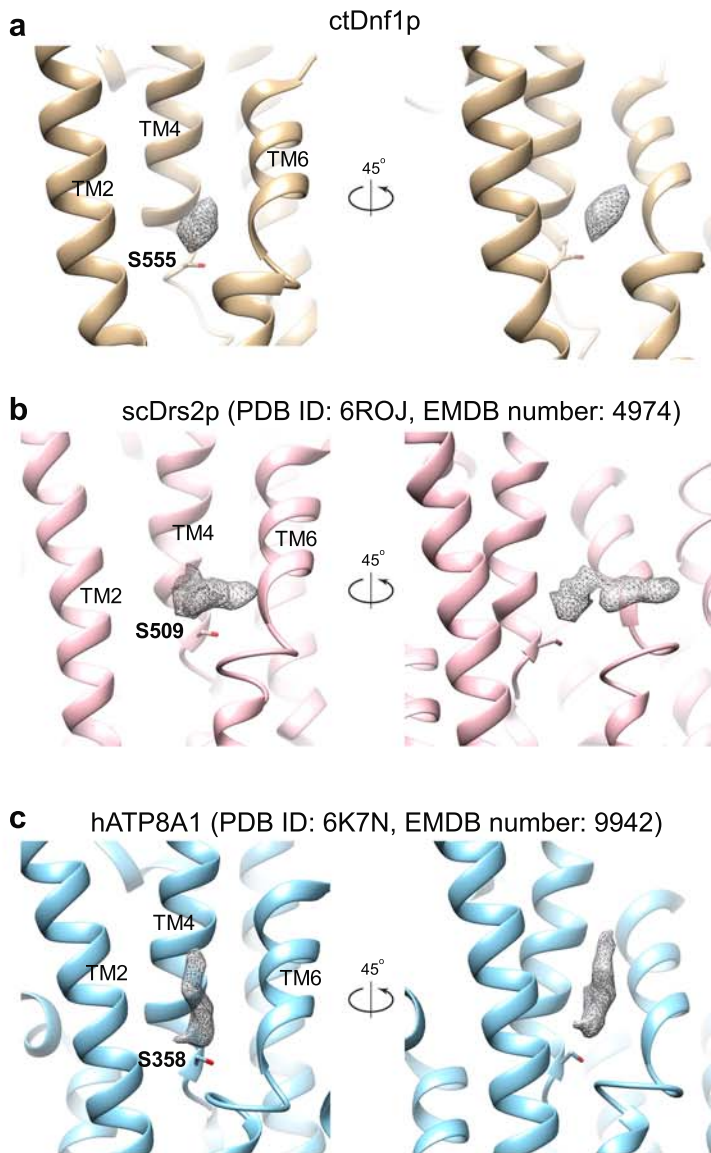



Fig. S10

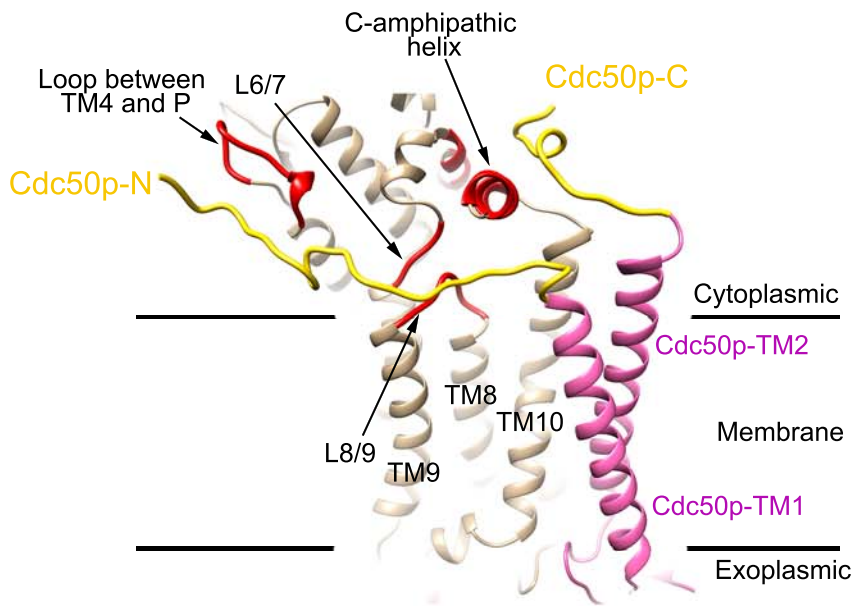

Fig. S11

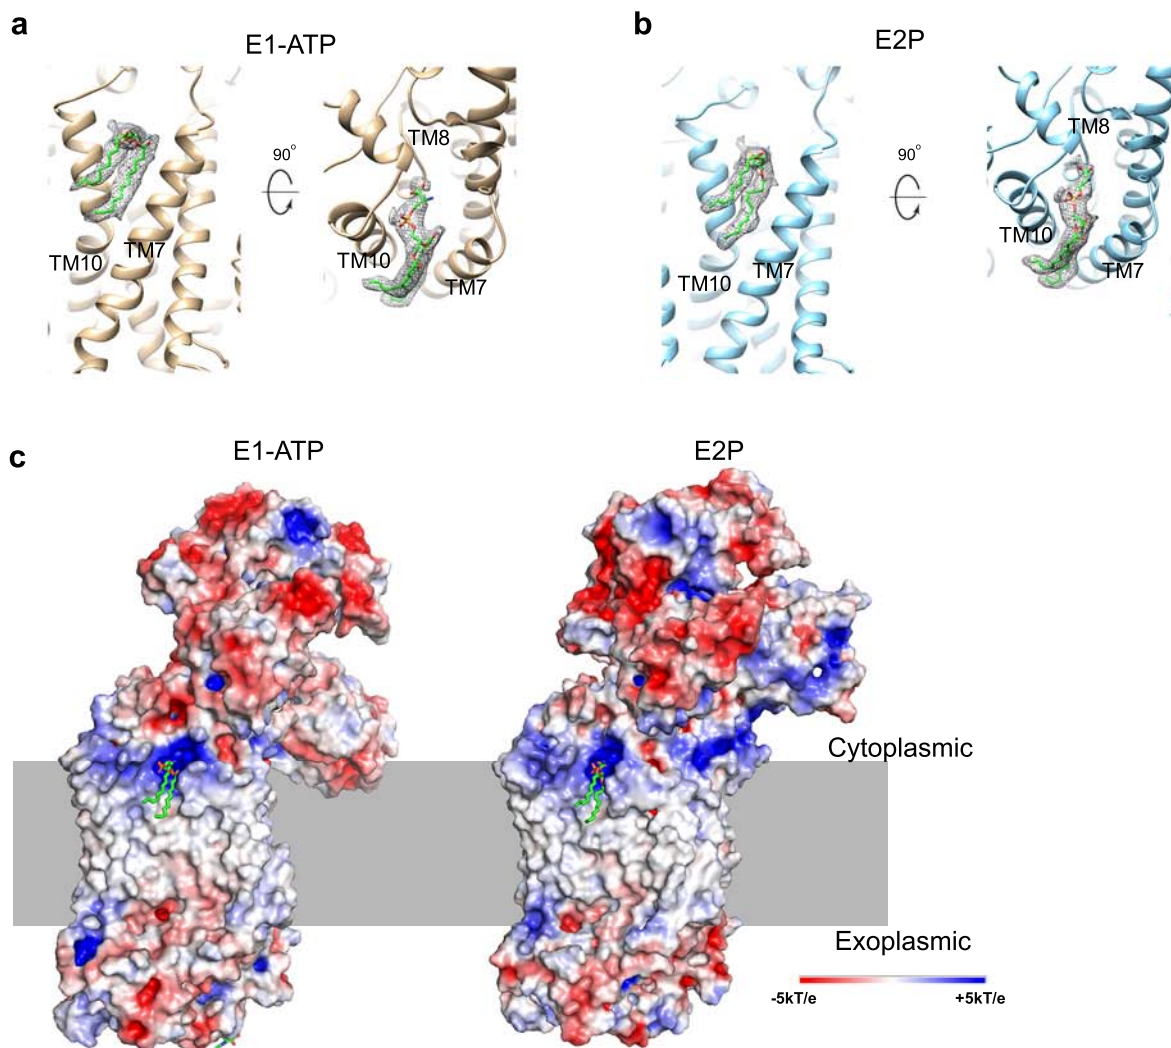

Fig. S12

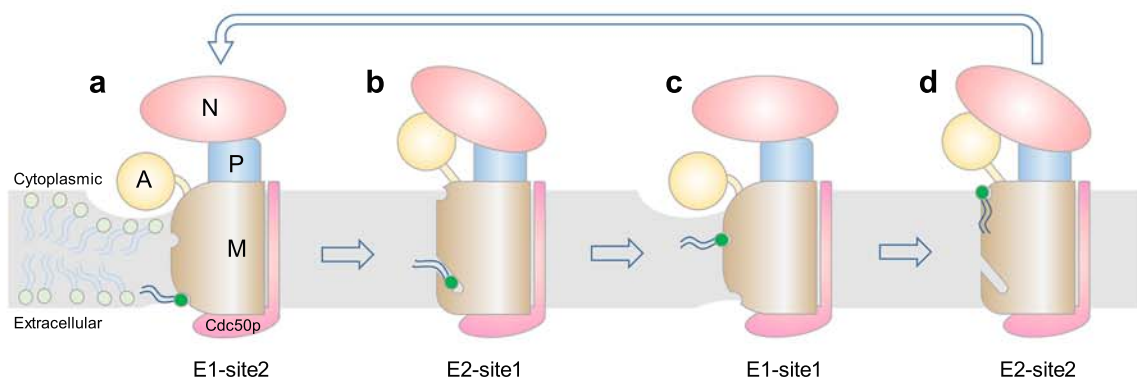

Fig. S13

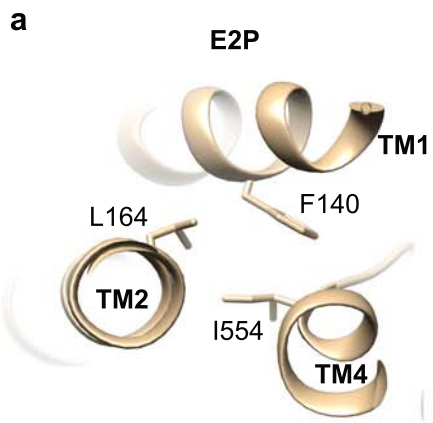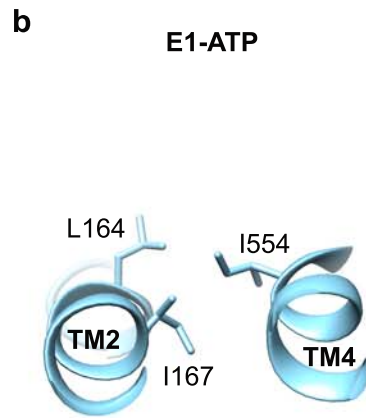

Supplement: 13238_2020_712_MOESM1_ESM.pdf [file 13238_2020_712_MOESM1_ESM.pdf]
